# A cross-package Bioconductor workflow for analysing methylation array data

*Jovana Maksimovic, Belinda Phipson and Alicia Oshlack*

*05/24/2016*

## Abstract

Methylation in the human genome is known to be associated with development and disease. The Illumina Infinium methylation arrays are by far the most common way to interrogate methylation across the human genome. This paper provides a Bioconductor workflow using multiple packages for the analysis of methylation array data. Specifically, we demonstrate the steps involved in a typical differential methylation analysis pipeline including: quality control, filtering, normalization, data exploration and statistical testing for probe-wise differential methylation. We further outline other analyses such as differential methylation of regions, differential variability analysis, estimating cell type composition and gene ontology testing. Finally, we provide some examples of how to visualise methylation array data.

## Introduction

DNA methylation, the addition of a methyl group to a CG dinucleotide of the DNA, is the most extensively studied epigenetic mark due to its role in both development and disease (Bird 2002; Laird 2003). Although DNA methylation can be measured in several ways, the epigenetics community has enthusiastically embraced the Illumina HumanMethylation450 (450k) array (Bibikova et al. 2011) as a cost-effective way to assay methylation across the human genome. More recently, Illumina has increased the genomic coverage of the platform to >850,000 sites with the release of their MethylationEPIC (850k) array. As methylation arrays are likely to remain popular for measuring methylation for the foreseeable future, it is necessary to provide robust workflows for methylation array analysis.

Measurement of DNA methylation by Infinium technology (Infinium I) was first employed by Illumina on the HumanMethylation27 (27k) array (Bibikova et al. 2009), which measured methylation at approximately 27,000 CpGs, primarily in gene promoters. Like bisulfite sequencing, the Infinium assay detects methylation status at single base resolution. However, due to its relatively limited coverage the array platform was not truly considered “genome-wide” until the arrival of the 450k array. The 450k array increased the genomic coverage of the platform to over 450,000 gene-centric sites by combining the original Infinium I assay with the novel Infinium II probes. Both assay types employ 50bp probes that query a [C/T] polymorphism created by bisulfite conversion of unmethylated cytosines in the genome, however, the Infinium I and II assays differ in the number of beads required to detect methylation at a single locus. Infinium I uses two bead types per CpG, one for each of the methylated and unmethylated states (Figure ??a). In contrast, the Infinium II design uses one bead type and the methylated state is determined at the single base extension step after hybridization (Figure ??b). The 850k array also uses a combination of the Infinium I and II assays but achieves additional coverage by increasing the size of each array; a 450k slide contains 12 arrays whilst the 850k has only 8.

Regardless of the Illumina array version, for each CpG, there are two measurements: a methylated intensity (denoted by  $M$ ) and an unmethylated intensity (denoted by  $U$ ). These intensity values can be used to determine the proportion of methylation at each CpG locus. Methylation levels are commonly reported as either beta values ( $\beta = M/(M + U + \alpha)$ ) or M-values ( $Mvalue = \log_2(M/U)$ ). Beta values and M-values are related through a logit transformation. Beta values are generally preferable for describing the level of methylation at a locus or for graphical presentation because percentage methylation is easily interpretable. However, due to their distributional properties, M-values are more appropriate for statistical testing (Du et al. 2010).

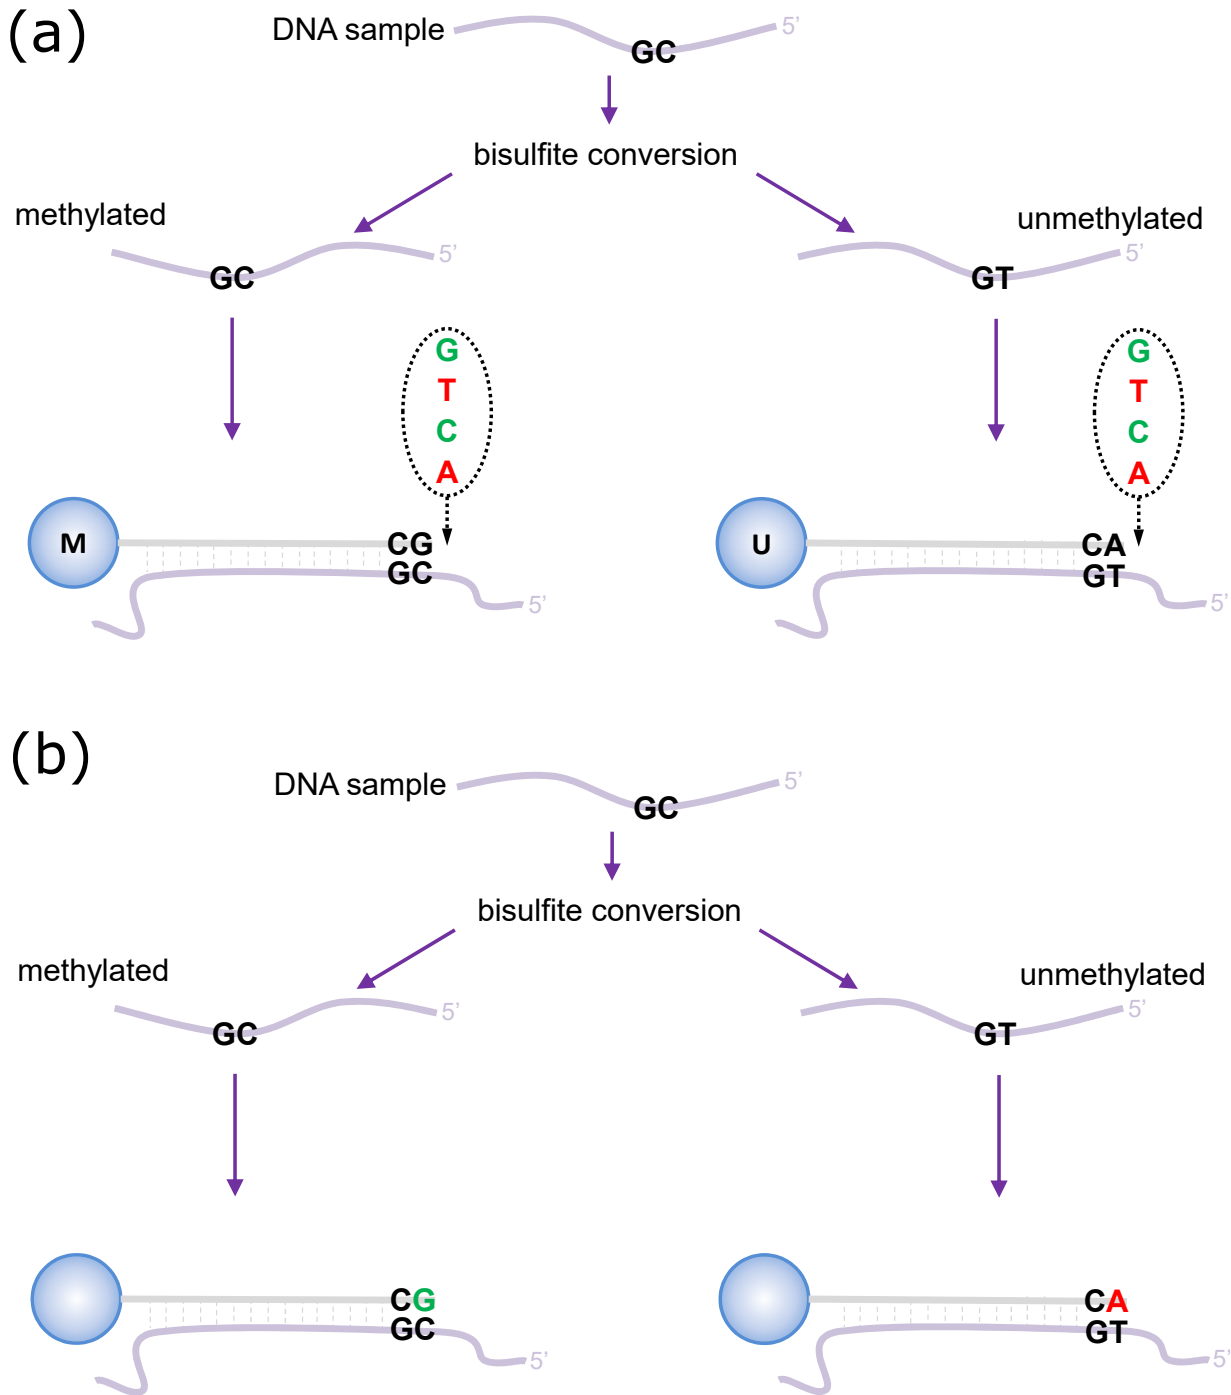

Figure 1: Illumina Infinium HumanMethylation450 assay, reproduced from Maksimovic, Gordon and Oshlack 2012. (a) Infinium I assay. Each individual CpG is interrogated using two bead types: methylated (M) and unmethylated (U). Both bead types will incorporate the same labeled nucleotide for the same target CpG, thereby producing the same color fluorescence. The nucleotide that is added is determined by the base downstream of the 'C' of the target CpG. The proportion of methylation can be calculated by comparing the intensities from the two different probes in the same color. (b) Infinium II assay. Each target CpG is interrogated using a single bead type. Methylation state is detected by single base extension at the position of the 'C' of the target CpG, which always results in the addition of a labeled 'G' or 'A' nucleotide, complementary to either the 'methylated' C or 'unmethylated' T, respectively. Each locus is detected in two colors, and methylation status is determined by comparing the two colors from the one position.

In this workflow, we will provide examples of the steps involved in analysing methylation array data using R (R Core Team 2014) and Bioconductor (Huber et al. 2015), including: quality control, filtering, normalization, data exploration and probe-wise differential methylation analysis. We will also cover other approaches such as differential methylation analysis of regions, differential variability analysis, gene ontology analysis and estimating cell type composition. Finally, we will provide some examples of useful ways to visualise methylation array data.

## Differential methylation analysis

To demonstrate the various aspects of analysing methylation data, we will be using a small, publicly available 450k methylation dataset (Y. Zhang et al. 2013). The dataset contains 10 samples in total; there are 4 different sorted T-cell types (naive, rTreg, act\_naive, act\_rTreg), collected from 3 different individuals (M28, M29, M30). For details describing sample collection and preparation, see Y. Zhang et al. (2013). An additional `birth` sample (individual VICS-72098-18-B) is included from another study (Cruickshank et al. 2013) to illustrate approaches for identifying and excluding poor quality samples.

```
targets[,c("Sample_Name", "Sample_Source", "Sample_Group")]
```

| ##    | Sample_Name        | Sample_Source | Sample_Group |
|-------|--------------------|---------------|--------------|
| ## 1  | 1                  | M28           | naive        |
| ## 2  | 2                  | M28           | rTreg        |
| ## 3  | 3                  | M28           | act_naive    |
| ## 4  | 4                  | M29           | naive        |
| ## 5  | 5                  | M29           | act_naive    |
| ## 6  | 6                  | M29           | act_rTreg    |
| ## 7  | 7                  | M30           | naive        |
| ## 8  | 8                  | M30           | rTreg        |
| ## 9  | 9                  | M30           | act_naive    |
| ## 10 | 10                 | M30           | act_rTreg    |
| ## 11 | 11 VICS-72098-18-B |               | birth        |

There are several R Bioconductor packages available that have been developed for analysing methylation array data, including *minfi* (Aryee et al. 2014), *missMethyl* (B. Phipson, Maksimovic, and Oshlack 2016), *wateRmelon* (Pidsley et al. 2013), *methylumi* (S. Davis et al. 2015), *ChAMP* (Morris et al. 2014) and *charm* (Aryee et al. 2011). Some of the packages, such as *minfi* and *methylumi* include a framework for reading in the raw data from IDAT files and various specialised objects for storing and manipulating the data throughout the course of an analysis. Other packages provide specialised analysis methods for normalisation and statistical testing that rely on either *minfi* or *methylumi* objects. It is possible to convert between *minfi* and *methylumi* data types, however, this is not always trivial. Thus, it is advisable to consider the methods that you are interested in using and the data types that are most appropriate before you begin your analysis. Another popular method for analysing methylation array data is *limma* (Ritchie et al. 2015), which was originally developed for gene expression microarray analysis. As *limma* operates on a matrix of values, it is easily applied to any data that can be converted to a `matrix` in R.

We will begin with an example of a **probe-wise** differential methylation analysis using *minfi* and *limma*. By **probe-wise** analysis we mean each individual CpG probe will be tested for differential methylation for the comparisons of interest and p-values and moderated t-statistics will be generated for each CpG probe.

## Loading the data

It is useful to begin an analysis in R by loading all the package libraries that are likely to be required.

```
# load packages required for analysis
library(limma)
library(minfi)
library(IlluminaHumanMethylation450kanno.ilmn12.hg19)
library(IlluminaHumanMethylation450kmanifest)
library(RColorBrewer)
library(missMethyl)
library(matrixStats)
library(minfiData)
library(Gviz)
library(DMRcate)
library(stringr)
```

The *minfi* package provides the Illumina manifest as an R object which can easily be loaded into the environment. The manifest contains all of the annotation information for each of the CpG probes on the 450k array. This is useful for determining where any differentially methylated probes are located in a genomic context.

```
# get the 450k annotation data
ann450k = getAnnotation(IlluminaHumanMethylation450kanno.ilmn12.hg19)
head(ann450k)
```

```
## DataFrame with 6 rows and 33 columns
##           chr      pos      strand      Name      AddressA
##           <character> <integer> <character> <character> <character>
## cg00050873      chrY    9363356      -      cg00050873      32735311
## cg00212031      chrY    21239348      -      cg00212031      29674443
## cg00213748      chrY    8148233      -      cg00213748      30703409
## cg00214611      chrY    15815688     -      cg00214611      69792329
## cg00455876      chrY    9385539      -      cg00455876      27653438
## cg01707559      chrY    6778695      +      cg01707559      45652402
##           AddressB      ProbeSeqA
##           <character>      <character>
## cg00050873      31717405      AAAAAAAAAACAACACACAACATAATAATTTTAAAAATAAAATAAACCCCA
## cg00212031      38703326      CCCAATTAACGCACAAAACTAAACAAATTATACAATCAAAAAAACATACA
## cg00213748      36767301      TTTTAACGCCTAACACCATTTTAAACAATAAAAAATTCTACAAAAAAAACA
## cg00214611      46723459      CTAACCTCCGAACCGCGCTTTATATACTAACTACAATATAACACAAACA
## cg00455876      69732350      AACTCTAACTACCCACACAACTCCAAAACTTCTCAAAAAAACTCA
## cg01707559      64689504      ACAAATTAATAAACTAAAACGAACGACGACTACAACAACAAAAACA
##           ProbeSeqB      Type
##           <character> <character>
## cg00050873      ACGAAAAACAACGCACAACATAATAATTTTAAAAATAAAATAAACCCCG      I
## cg00212031      CCCAATTAACCGCAAAAACTAAACAAATTATACGATCGAAAAACGTACG      I
## cg00213748      TTTTAACGCCTAACACCGTTTAAACGATAAAAAATTCTACAAAAAAAACG      I
## cg00214611      CTAACCTCCGAACCGCGCTTTATATACTAACTACAATATAACGGAACG      I
## cg00455876      AACTCTAACTACCCGACACAACTCCAAAACTTCTCGAAAAAACTCG      I
## cg01707559      GCGAATTAATAAACTAAAACGAACGCGACGACTACAACGACAAAAACG      I
##           NextBase      Color      Probe_rs      Probe_maf      CpG_rs
##           <character> <character> <character> <numeric> <character>
## cg00050873      A      Red      NA      NA      NA
## cg00212031      T      Red      NA      NA      NA
## cg00213748      A      Red      NA      NA      NA
## cg00214611      A      Red      NA      NA      NA
```

```
## cg00455876      A      Red      NA      NA      NA
## cg01707559      A      Red      NA      NA      NA
##      CpG_maf      SBE_rs      SBE_maf      Islands_Name
##      <numeric> <character> <numeric>      <character>
## cg00050873      NA      NA      NA      chrY:9363680-9363943
## cg00212031      NA      NA      NA      chrY:21238448-21240005
## cg00213748      NA      NA      NA      chrY:8147877-8148210
## cg00214611      NA      NA      NA      chrY:15815488-15815779
## cg00455876      NA      NA      NA      chrY:9385471-9385777
## cg01707559      NA      NA      NA      chrY:6778574-6780028
##      Relation_to_Island
##      <character>
## cg00050873      N_Shore
## cg00212031      Island
## cg00213748      S_Shore
## cg00214611      Island
## cg00455876      Island
## cg01707559      Island
##
## cg00050873 TATCTCTGTCTGGCGAGGAGGCAACGCACAACGTGGTGGTTTTTGGAGTGGGTGGACCC[CG]GC
## cg00212031 CCATTGGCCCGCCCGAGTTGGCCGAGGACTGAGCAAGTTATGCGGTGCGGAAGACGTG[CG]TT
## cg00213748 TCTGTGGGACCATTTTAACGCCTGGCACCCTTTTAAACGATGGAGTTCTGCAGGAGGGGG[CG]AC
## cg00214611 GCGCCGGCAGGACTAGCTTCCGGGCCGCGCTTTGTGTGCTGGGTGCAGTGTGGCGCGGG[CG]AG
## cg00455876 CGCGTGTGCTGGACTCTGAGCTACCCGGCACAAGCTCCAAGGGCTTCTCGGAGGAGGCT[CG]GG
## cg01707559 AGCGGCCGCTCCCAGTGGTGGTCACCGCCAGTGCCAATCCCTTGCGCCGCGGTGCAGTCC[CG]CC
##
##      SourceSeq Random_Loci
##      <character> <character>
## cg00050873 CGGGGTCCACCCACTCCAAAAACCACCACAGTTGTGCGTTGCCTCCTCGC
## cg00212031 CGCACGTCTTCCCGACCGCATAAATTGCTCAGTCCCTGCGGCCAACTGGG
## cg00213748 CGCCCCCTCCTGCAGAACCTCCATCGTTAAAACGGTGCCAGGCGTTAAAA
## cg00214611 CGCCCGCGCCACACTGCAGCCAGCACACAAAGCGCGCCCGGAAGCTAG
## cg00455876 GACTCTGAGCTACCCGGCACAAGCTCCAAGGGCTTCTCGGAGGAGGCTCG
## cg01707559 CGCCCTCTGTGCTGCAGCCGCGCGCCGCTCCAGTGCCCCCAATTTCGC
##
##      Methyl27_Loci UCSC_RefGene_Name      UCSC_RefGene_Accession
##      <character>      <character>      <character>
## cg00050873      TSPY4;FAM197Y2      NM_001164471;NR_001553
## cg00212031      TTTY14      NR_001543
## cg00213748
## cg00214611      TMSB4Y;TMSB4Y      NM_004202;NM_004202
## cg00455876
## cg01707559      TBL1Y;TBL1Y;TBL1Y NM_134259;NM_033284;NM_134258
##
##      UCSC_RefGene_Group      Phantom      DMR      Enhancer
##      <character> <character> <character> <character>
## cg00050873      Body;TSS1500
## cg00212031      TSS200
## cg00213748
## cg00214611      1stExon;5'UTR
## cg00455876
## cg01707559 TSS200;TSS200;TSS200
##
##      HMM_Island Regulatory_Feature_Name
##      <character>      <character>
## cg00050873      Y:9973136-9976273
## cg00212031      Y:19697854-19699393
## cg00213748      Y:8207555-8208234
```

```
## cg00214611 Y:14324883-14325218      Y:15815422-15815706
## cg00455876 Y:9993394-9995882
## cg01707559 Y:6838022-6839951
##                      Regulatory_Feature_Group      DHS
##                      <character> <character>
## cg00050873
## cg00212031
## cg00213748
## cg00214611 Promoter_Associated_Cell_type_specific
## cg00455876
## cg01707559
```

The simplest way to import the raw methylation data into R is using the *minfi* function `read.450k.sheet`, along with the path to the IDAT files and a sample sheet. The sample sheet is a CSV (comma-separated) file containing one line per sample, with a number of columns describing each sample. The format expected by the `read.450k.sheet` function is based on the sample sheet file that usually accompanies Illumina methylation array data. It is also very similar to the targets file described by the *limma* package. Importing the sample sheet into R creates a `data.frame` with one row for each sample and several columns. The `read.450k.sheet` function uses the specified path and other information from the sample sheet to create a column called `Baseline` which specifies the location of each individual IDAT file in the experiment.

```
# set up a path for your project
projectDirectory <- "/absolute/path/to/your/project"
```

```
# set up a path to your data directory - which should be in your project directory
dataDirectory <- paste(projectDirectory, "data", sep="/")
```

```
# read in the sample sheet for the experiment
targets <- read.450k.sheet(dataDirectory, pattern="SampleSheet.csv")
```

```
## [read.450k.sheet] Found the following CSV files:
## [1] "/group/bioi1/shared/BioinfoSummer2015/450kAnalysisWorkshop/data/SampleSheet.csv"
```

```
targets
```

```
##      Sample_Name Sample_Well Sample_Source Sample_Group Sample_Label
## 1              1         A1          M28         naive         naive
## 2              2         B1          M28          rTreg          rTreg
## 3              3         C1          M28      act_naive      act_naive
## 4              4         D1          M29         naive         naive
## 5              5         E1          M29      act_naive      act_naive
## 6              6         F1          M29      act_rTreg      act_rTreg
## 7              7         G1          M30         naive         naive
## 8              8         H1          M30          rTreg          rTreg
## 9              9         A2          M30      act_naive      act_naive
## 10             10         B2          M30      act_rTreg      act_rTreg
## 11             11        H06 VICS-72098-18-B      birth          birth
##      Pool_ID Array      Slide
## 1          NA R01C01 6264509100
## 2          NA R02C01 6264509100
## 3          NA R03C01 6264509100
## 4          NA R04C01 6264509100
```

```
## 5      NA R05C01 6264509100
## 6      NA R06C01 6264509100
## 7      NA R01C02 6264509100
## 8      NA R02C02 6264509100
## 9      NA R03C02 6264509100
## 10     NA R04C02 6264509100
## 11     NA R06C02 5975827018
##
## 1  /group/bioi1/shared/BioinfoSummer2015/450kAnalysisWorkshop/data/6264509
## 2  /group/bioi1/shared/BioinfoSummer2015/450kAnalysisWorkshop/data/6264509
## 3  /group/bioi1/shared/BioinfoSummer2015/450kAnalysisWorkshop/data/6264509
## 4  /group/bioi1/shared/BioinfoSummer2015/450kAnalysisWorkshop/data/6264509
## 5  /group/bioi1/shared/BioinfoSummer2015/450kAnalysisWorkshop/data/6264509
## 6  /group/bioi1/shared/BioinfoSummer2015/450kAnalysisWorkshop/data/6264509
## 7  /group/bioi1/shared/BioinfoSummer2015/450kAnalysisWorkshop/data/6264509
## 8  /group/bioi1/shared/BioinfoSummer2015/450kAnalysisWorkshop/data/6264509
## 9  /group/bioi1/shared/BioinfoSummer2015/450kAnalysisWorkshop/data/6264509
## 10 /group/bioi1/shared/BioinfoSummer2015/450kAnalysisWorkshop/data/6264509
## 11 /group/bioi1/shared/BioinfoSummer2015/450kAnalysisWorkshop/data/5975827
```

Now that we have imported the information about the samples and where the data is located, we can import the raw intensity signals into R from the IDAT files. This creates an `RGChannelSet` object that contains all the raw intensity data, from both the red and green colour channels, for each of the samples. At this stage, it can be useful to rename the samples with more descriptive names.

```
# read in the raw data from the IDAT files
```

```
rgSet <- read.450k.exp(targets=targets)
rgSet
```

```
## RGChannelSet (storageMode: lockedEnvironment)
## assayData: 622399 features, 11 samples
##   element names: Green, Red
## An object of class 'AnnotatedDataFrame'
##   sampleNames: 6264509100_R01C01 6264509100_R02C01 ...
##                 5975827018_R06C02 (11 total)
##   varLabels: Sample_Name Sample_Well ... filenames (10 total)
##   varMetadata: labelDescription
## Annotation
##   array: IlluminaHumanMethylation450k
##   annotation: ilmn12.hg19
```

```
# give the samples descriptive names
```

```
targets$ID <- paste(targets$Sample_Group,targets$Sample_Name,sep=".")
sampleNames(rgSet) <- targets$ID
rgSet
```

```
## RGChannelSet (storageMode: lockedEnvironment)
## assayData: 622399 features, 11 samples
##   element names: Green, Red
## An object of class 'AnnotatedDataFrame'
##   sampleNames: naive.1 rTreg.2 ... birth.11 (11 total)
##   varLabels: Sample_Name Sample_Well ... filenames (10 total)
##   varMetadata: labelDescription
```



```
## Annotation
## array: IlluminaHumanMethylation450k
## annotation: ilmn12.hg19
```

## Quality control

Once the data has been imported into R, we can evaluate its quality. Firstly, we need to calculate detection p-values. We can generate a detection p-value for every CpG in every sample, which is indicative of the quality of the signal. The method used by *minfi* to calculate detection p-values compares the total signal ( $M + U$ ) for each probe to the background signal level, which is estimated from the negative control probes. Very small p-values are indicative of a reliable signal whilst large p-values, for example  $>0.01$ , generally indicate a poor quality signal.

Plotting the mean detection p-value for each sample allows us to gauge the general quality of the samples in terms of the overall signal reliability. Samples that have many failed probes will have relatively large mean detection p-values.

```
# calculate the detection p-values
detP <- detectionP(rgSet)
head(detP)
```

```
##          naive.1 rTreg.2 act_naive.3 naive.4 act_naive.5 act_rTreg.6
## cg00050873      0      0 0.000000e+00      0 0.000000e+00      0
## cg00212031      0      0 0.000000e+00      0 0.000000e+00      0
## cg00213748      0      0 1.181832e-12      0 8.21565e-15      0
## cg00214611      0      0 0.000000e+00      0 0.000000e+00      0
## cg00455876      0      0 0.000000e+00      0 0.000000e+00      0
## cg01707559      0      0 0.000000e+00      0 0.000000e+00      0
##          naive.7      rTreg.8 act_naive.9 act_rTreg.10 birth.11
## cg00050873      0 0.000000e+00      0 0.000000e+00 0.0000000
## cg00212031      0 0.000000e+00      0 0.000000e+00 0.0000000
## cg00213748      0 1.469801e-05      0 1.365951e-08 0.6735224
## cg00214611      0 0.000000e+00      0 0.000000e+00 0.7344451
## cg00455876      0 0.000000e+00      0 0.000000e+00 0.0000000
## cg01707559      0 0.000000e+00      0 0.000000e+00 0.0000000
```

```
# examine mean detection p-values across all samples to identify any failed samples
pal <- brewer.pal(8,"Dark2")
par(mfrow=c(1,2))
barplot(colMeans(detP), col=pal[factor(targets$Sample_Group)], las=2,
        cex.names=0.8, ylab="Mean detection p-values")
abline(h=0.05,col="red")
legend("topleft", legend=levels(factor(targets$Sample_Group)), fill=pal,
       bg="white")

barplot(colMeans(detP), col=pal[factor(targets$Sample_Group)], las=2,
        cex.names=0.8, ylim=c(0,0.002), ylab="Mean detection p-values")
abline(h=0.05,col="red")
legend("topleft", legend=levels(factor(targets$Sample_Group)), fill=pal,
       bg="white")
```

The *minfi* `qcReport` function generates many other useful quality control plots. The *minfi* vignette describes the various plots and how they should be interpreted in detail. Generally, samples that look poor based on



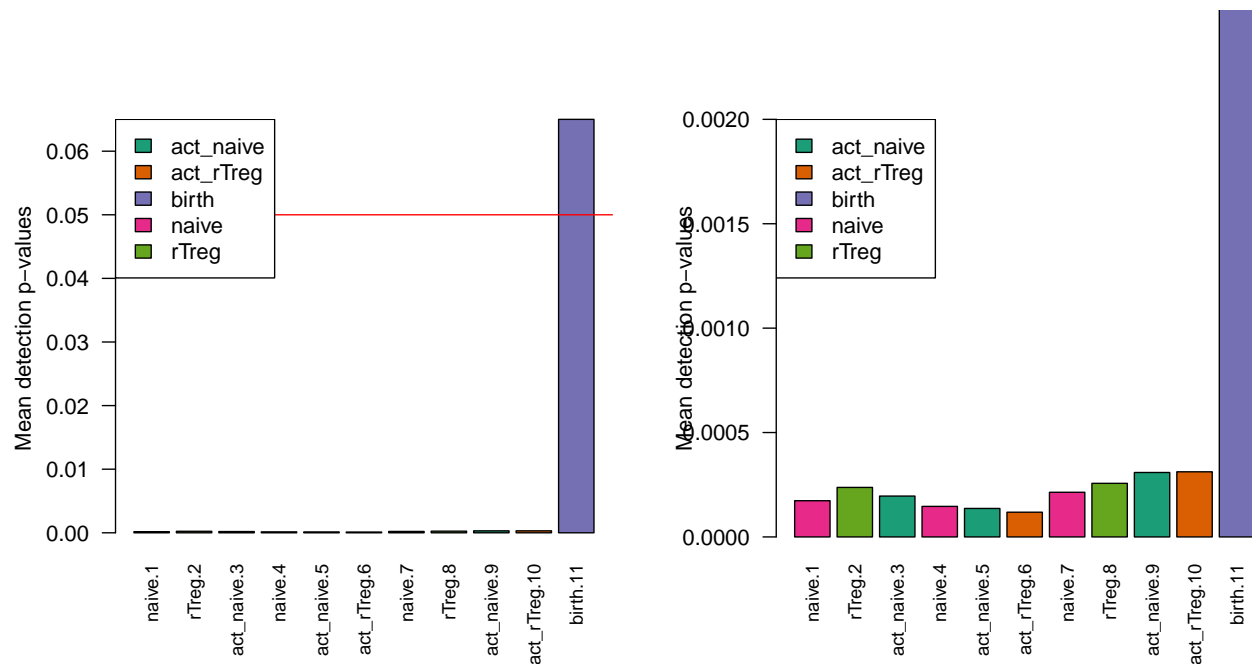

Figure 2: Mean detection p-values summarise the quality of the signal across all the probes in each sample.

mean detection p-value will also look poor using other metrics and it is usually advisable to exclude them from further analysis.

```
qcReport(rgSet, sampNames=targets$ID, sampGroups=targets$Sample_Group,
pdf="qcReport.pdf")
```

Poor quality samples can be easily excluded from the analysis using a detection p-value cutoff, for example  $>0.05$ . For this particular dataset, the **birth** sample shows a very high mean detection p-value, and hence it is excluded from subsequent analysis.

```
# remove poor quality samples
keep <- colMeans(detP) < 0.05
rgSet <- rgSet[,keep]
rgSet
```

```
## RGChannelSet (storageMode: lockedEnvironment)
## assayData: 622399 features, 10 samples
## element names: Green, Red
## An object of class 'AnnotatedDataFrame'
## sampleNames: naive.1 rTreg.2 ... act_rTreg.10 (10 total)
## varLabels: Sample_Name Sample_Well ... filenames (10 total)
## varMetadata: labelDescription
## Annotation
## array: IlluminaHumanMethylation450k
## annotation: ilmn12.hg19
```

```
# remove poor quality samples from targets data
targets <- targets[keep,]
targets[,1:5]
```

```
##      Sample_Name Sample_Well Sample_Source Sample_Group Sample_Label
## 1           1         A1          M28         naive         naive
## 2           2         B1          M28         rTreg          rTreg
## 3           3         C1          M28         act_naive        act_naive
## 4           4         D1          M29         naive         naive
## 5           5         E1          M29         act_naive        act_naive
## 6           6         F1          M29         act_rTreg        act_rTreg
## 7           7         G1          M30         naive         naive
## 8           8         H1          M30         rTreg          rTreg
## 9           9         A2          M30         act_naive        act_naive
## 10          10         B2          M30         act_rTreg        act_rTreg
```

```
# remove poor quality samples from detection p-value table
detP <- detP[,keep]
dim(detP)
```

```
## [1] 485512      10
```

## Normalization

To minimise the unwanted variation within and between samples, various data normalizations can be applied. Many different types of normalization have been developed for methylation arrays and it is beyond the scope of this workflow to compare and contrast all of them (J. Fortin et al. 2014; M. C. Wu et al. 2014; Sun et al. 2011; D. Wang et al. 2012; Maksimovic, Gordon, and Oshlack 2012; Mancuso et al. 2011; Touleimat and Tost 2012; Teschendorff et al. 2013; Pidsley et al. 2013; T. J. Triche et al. 2013). Several methods have been built into *minfi* and can be directly applied within its framework (J. Fortin et al. 2014; T. J. Triche et al. 2013; Maksimovic, Gordon, and Oshlack 2012; Touleimat and Tost 2012), whilst others are *methylnmi*-specific or require custom data types (M. C. Wu et al. 2014; Sun et al. 2011; D. Wang et al. 2012; Mancuso et al. 2011; Teschendorff et al. 2013; Pidsley et al. 2013). Although there is no single normalisation method that is universally considered best, a recent study by J. Fortin et al. (2014) has suggested that a good rule of thumb within the *minfi* framework is that the `preprocessFunnorm` (J. Fortin et al. 2014) function is most appropriate for datasets with global methylation differences such as cancer/normal or vastly different tissue types, whilst the `preprocessQuantile` function (Touleimat and Tost 2012) is more suited for datasets where you do not expect global differences between your samples, for example a single tissue. As we are comparing different blood cell types, which are globally relatively similar, we will apply the `preprocessQuantile` method to our data. Note that after normalization, the data is housed in a `GenomicRatioSet` object. This is a much more compact representation of the data as the colour channel information has been discarded and the *M* and *U* intensity information has been converted to M-values and beta values, together with associated genomic coordinates.

```
# normalize the data; this results in a GenomicRatioSet object
mSetSq <- preprocessQuantile(rgSet)
```

```
## [preprocessQuantile] Mapping to genome.
## [preprocessQuantile] Fixing outliers.
```

```
## Warning in .getSex(CN = CN, xIndex = xIndex, yIndex = yIndex, cutoff
## = cutoff): An inconsistency was encountered while determining sex. One
## possibility is that only one sex is present. We recommend further checks,
## for example with the plotSex function.
```

```
## [preprocessQuantile] Quantile normalizing.
```

```
# create a MethylSet object from the raw data for plotting
mSetRaw <- preprocessRaw(rgSet)

# visualise what the data looks like before and after normalization
par(mfrow=c(1,2))
densityPlot(rgSet, sampGroups=targets$Sample_Group,main="Raw", legend=FALSE)
densityPlot(getBeta(mSetSq), sampGroups=targets$Sample_Group,
            main="Normalized", legend=FALSE)
```

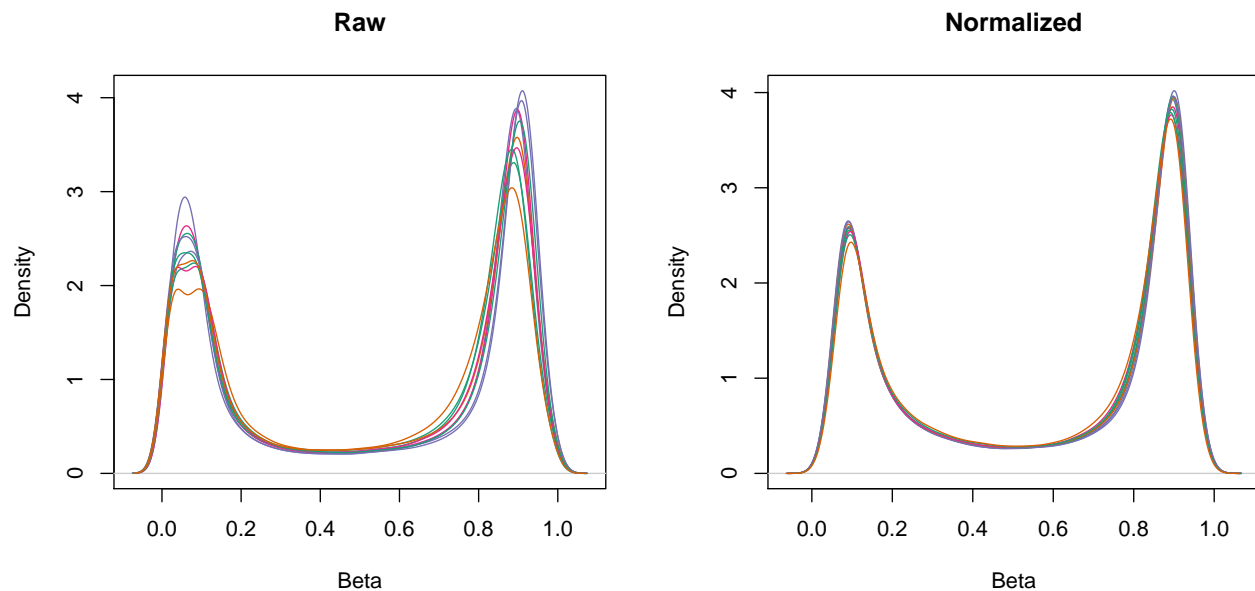

Figure 3: The density plots show the distribution of the beta values for each sample before and after normalization.

## Data exploration

Multi-dimensional scaling (MDS) plots are excellent for visualising data, and are usually some of the first plots that should be made when exploring the data. MDS plots are based on principle components analysis and are an unsupervised method for looking at the similarities and differences between the various samples. Samples that are more similar to each other should cluster together, and samples that are very different should be further apart on the plot. Dimension one (or principle component one) captures the greatest source of variation in the data, dimension two captures the second greatest source of variation in the data and so on. Colouring the data points or labels by known factors of interest can often highlight exactly what the greatest sources of variation are in the data. It is also possible to use MDS plots to decipher sample mix-ups.

```
# MDS plots to look at largest sources of variation
par(mfrow=c(1,2))
plotMDS(getM(mSetSq), top=1000, gene.selection="common",
        col=pal[factor(targets$Sample_Group)])
legend("top", legend=levels(factor(targets$Sample_Group)), text.col=pal,
      bg="white", cex=0.7)

plotMDS(getM(mSetSq), top=1000, gene.selection="common",
        col=pal[factor(targets$Sample_Source)])
```

```
legend("top", legend=levels(factor(targets$Sample_Source)), text.col=pal,
      bg="white", cex=0.7)
```

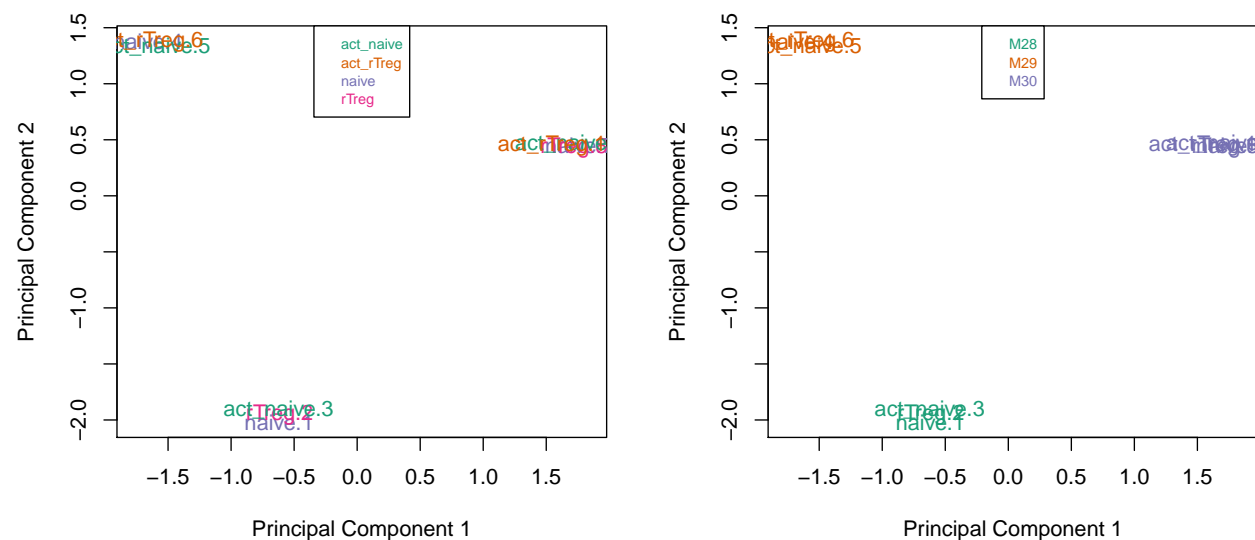

Figure 4: Multi-dimensional scaling plots are a good way to visualise the relationships between the samples in an experiment.

Examining the MDS plots for this dataset demonstrates that the largest source of variation is the difference between individuals. The higher dimensions reveal that the differences between cell types are largely captured by the third and fourth principal components. This type of information is useful in that it can inform downstream analysis. If obvious sources of unwanted variation are revealed by the MDS plots, we can include them in our statistical model to account for them. In the case of this particular dataset, we will include individual to individual variation in our statistical model.

```
# Examine higher dimensions to look at other sources of variation
par(mfrow=c(1,3))
plotMDS(getM(mSetSq), top=1000, gene.selection="common",
        col=pal[factor(targets$Sample_Group)], dim=c(1,3))
legend("top", legend=levels(factor(targets$Sample_Group)), text.col=pal,
      cex=0.7, bg="white")

plotMDS(getM(mSetSq), top=1000, gene.selection="common",
        col=pal[factor(targets$Sample_Group)], dim=c(2,3))
legend("topleft", legend=levels(factor(targets$Sample_Group)), text.col=pal,
      cex=0.7, bg="white")

plotMDS(getM(mSetSq), top=1000, gene.selection="common",
        col=pal[factor(targets$Sample_Group)], dim=c(3,4))
legend("topright", legend=levels(factor(targets$Sample_Group)), text.col=pal,
      cex=0.7, bg="white")
```

## Filtering

Poor performing probes are generally filtered out prior to differential methylation analysis. As the signal from these probes is unreliable, by removing them we perform fewer statistical tests and thus incur a reduced

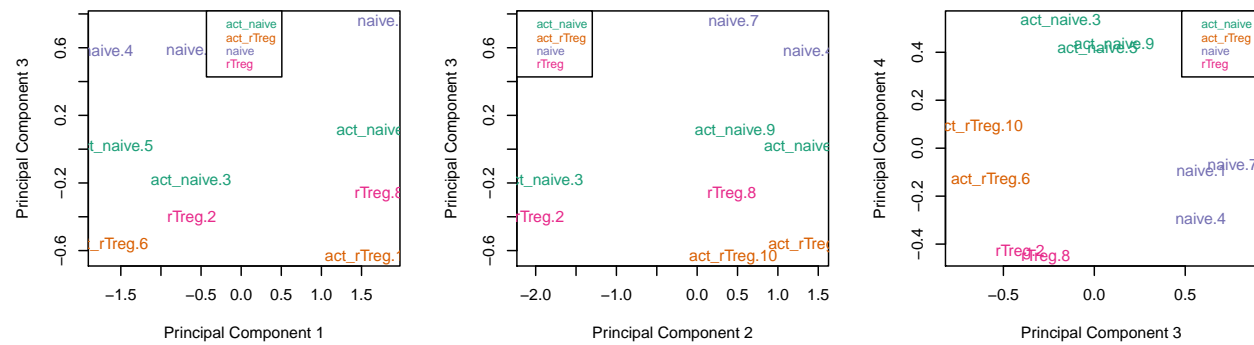

Figure 5: Examining the higher dimensions of an MDS plot can reveal significant sources of variation in the data.

multiple testing penalty. We filter out probes that have failed in one or more samples based on detection p-value.

```
# ensure probes are in the same order in the mSetSq and detP objects
detP <- detP[match(featureNames(mSetSq),rownames(detP)),]

# remove any probes that have failed in one or more samples
keep <- rowSums(detP < 0.01) == ncol(mSetSq)
table(keep)
```

```
## keep
## FALSE TRUE
## 977 484535
```

```
mSetSqFlt <- mSetSq[keep,]
mSetSqFlt
```

```
## class: GenomicRatioSet
## dim: 484535 10
## metadata():
## assays(2): M CN
## rownames(484535): cg13869341 cg14008030 ... cg08265308 cg14273923
## rowRanges metadata column names():
## colnames(10): naive.1 rTreg.2 ... act_naive.9 act_rTreg.10
## colData names(11): Sample_Name Sample_Well ... filenames
## predictedSex
## Annotation
## array: IlluminaHumanMethylation450k
## annotation: ilmn12.hg19
## Preprocessing
## Method: Raw (no normalization or bg correction)
## minfi version: 1.16.1
## Manifest version: 0.4.0
```

Depending on the nature of your samples and your biological question you may also choose to filter out the probes from the X and Y chromosomes or probes that are known to have common SNPs at the CpG site. As the samples in this dataset were all derived from male donors, we will not be removing the sex chromosome probes as part of this analysis, however example code is provided below. A different dataset, which contains

both male and female samples, is used to demonstrate a Differential Variability analysis and provides an example of when sex chromosome removal is necessary.

```
# if your data includes males and females, remove probes on the sex chromosomes
keep <- !(featureNames(mSetSqFlt) %in% ann450k$Name[ann450k$chr %in%
                                     c("chrX", "chrY")])

table(keep)
mSetSqFlt <- mSetSqFlt[keep,]
```

There is a function in *minfi* that provides a simple interface for the removal of probes where common SNPs may affect the CpG. You can either remove all probes affected by SNPs (default), or only those with minor allele frequencies greater than a specified value.

```
# remove probes with SNPs at CpG site
mSetSqFlt <- dropLociWithSnps(mSetSqFlt)
mSetSqFlt
```

```
## class: GenomicRatioSet
## dim: 467351 10
## metadata(0):
## assays(2): M CN
## rownames(467351): cg13869341 cg14008030 ... cg08265308 cg14273923
## rowRanges metadata column names(0):
## colnames(10): naive.1 rTreg.2 ... act_naive.9 act_rTreg.10
## colData names(11): Sample_Name Sample_Well ... filenames
##   predictedSex
## Annotation
##   array: IlluminaHumanMethylation450k
##   annotation: ilmn12.hg19
## Preprocessing
##   Method: Raw (no normalization or bg correction)
##   minfi version: 1.16.1
##   Manifest version: 0.4.0
```

We will also filter out probes that have shown to be cross-reactive, that is, probes that have been demonstrated to map to multiple places in the genome. This list was originally published by Chen et al. (2013) and can be obtained from the authors' website.

```
# exclude cross reactive probes
xReactiveProbes <- read.csv(file=paste(dataDirectory,
                                     "48639-non-specific-probes-Illumina450k.csv",
                                     sep="/"), stringsAsFactors=FALSE)

keep <- !(featureNames(mSetSqFlt) %in% xReactiveProbes$TargetID)
table(keep)
```

```
## keep
## FALSE TRUE
## 27433 439918
```

```
mSetSqFlt <- mSetSqFlt[keep,]
mSetSqFlt
```

```
## class: GenomicRatioSet
## dim: 439918 10
## metadata(0):
## assays(2): M CN
## rownames(439918): cg13869341 cg24669183 ... cg08265308 cg14273923
## rowRanges metadata column names(0):
## colnames(10): naive.1 rTreg.2 ... act_naive.9 act_rTreg.10
## colData names(11): Sample_Name Sample_Well ... filenames
##   predictedSex
## Annotation
##   array: IlluminaHumanMethylation450k
##   annotation: ilmn12.hg19
## Preprocessing
##   Method: Raw (no normalization or bg correction)
##   minfi version: 1.16.1
##   Manifest version: 0.4.0
```

Once the data has been filtered and normalised, it is often useful to re-examine the MDS plots to see if the relationship between the samples has changed. It is apparent from the new MDS plots that much of the inter-individual variation has been removed as this is no longer the first principal component, likely due to the removal of the SNP-affected CpG probes. However, the samples do still cluster by individual in the second dimension and thus a factor for individual should still be included in the model.

```
par(mfrow=c(1,2))
plotMDS(getM(mSetSqFilt), top=1000, gene.selection="common",
        col=pal[factor(targets$Sample_Group)], cex=0.8)
legend("right", legend=levels(factor(targets$Sample_Group)), text.col=pal,
       cex=0.65, bg="white")

plotMDS(getM(mSetSqFilt), top=1000, gene.selection="common",
        col=pal[factor(targets$Sample_Source)])
legend("right", legend=levels(factor(targets$Sample_Source)), text.col=pal,
       cex=0.7, bg="white")
```

```
par(mfrow=c(1,3))
# Examine higher dimensions to look at other sources of variation
plotMDS(getM(mSetSqFilt), top=1000, gene.selection="common",
        col=pal[factor(targets$Sample_Source)], dim=c(1,3))
legend("right", legend=levels(factor(targets$Sample_Source)), text.col=pal,
       cex=0.7, bg="white")

plotMDS(getM(mSetSqFilt), top=1000, gene.selection="common",
        col=pal[factor(targets$Sample_Source)], dim=c(2,3))
legend("topright", legend=levels(factor(targets$Sample_Source)), text.col=pal,
       cex=0.7, bg="white")

plotMDS(getM(mSetSqFilt), top=1000, gene.selection="common",
        col=pal[factor(targets$Sample_Source)], dim=c(3,4))
legend("right", legend=levels(factor(targets$Sample_Source)), text.col=pal,
       cex=0.7, bg="white")
```

The next step is to calculate M-values and beta values. As previously mentioned, M-values have nicer statistical properties and are thus better for use in statistical analysis of methylation data whilst beta values



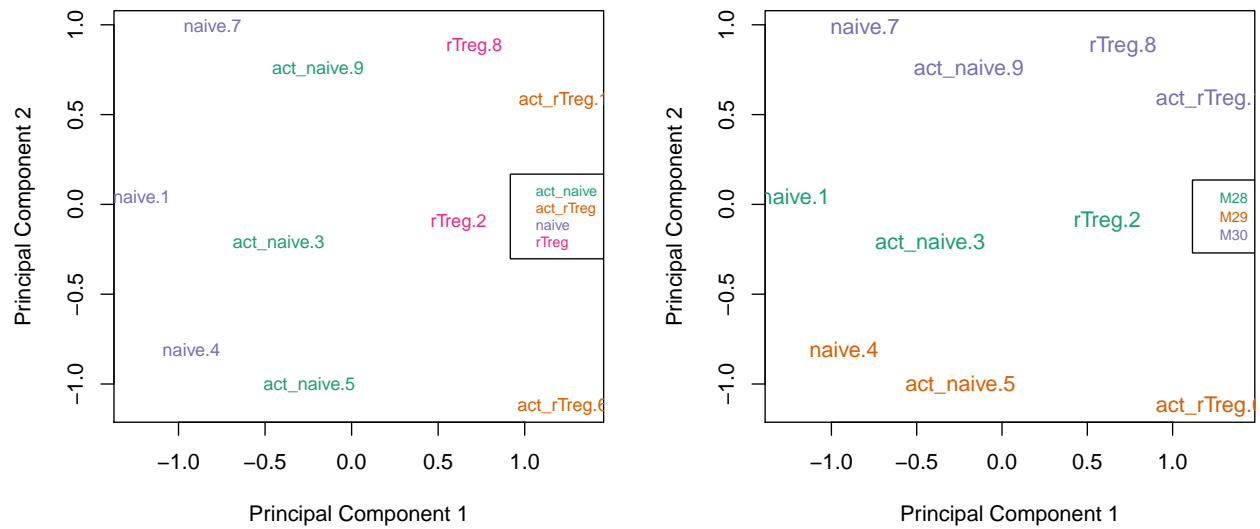

Figure 6: Removing SNP-affected CpGs probes from the data changes the sample clustering in the MDS plots.

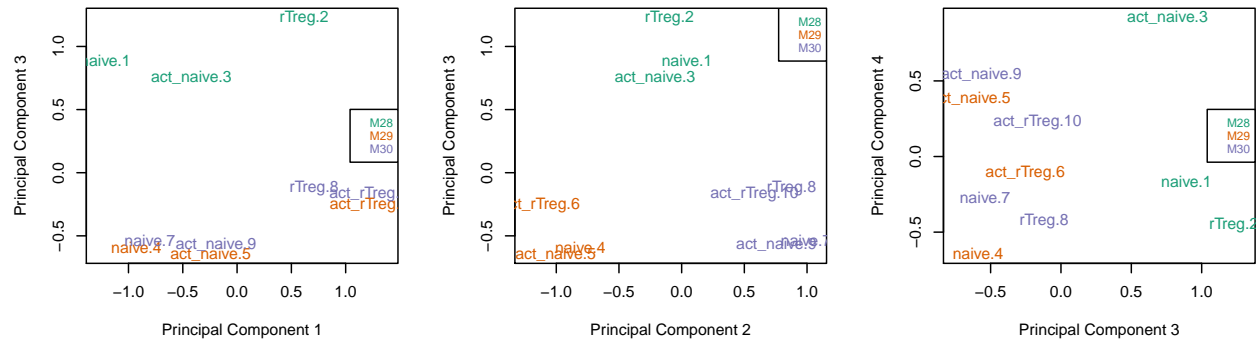

Figure 7: Examining the higher dimensions of the MDS plots shows that significant inter-individual variation still exists in the second and third principle components.

are easy to interpret and are thus better for displaying data. A detailed comparison of M-values and beta values was published by Du et al. (2010).

```
# calculate M-values for statistical analysis
```

```
mVals <- getM(mSetSqFilt)
```

```
head(mVals[,1:5])
```

```
##           naive.1    rTreg.2 act_naive.3    naive.4 act_naive.5
## cg13869341  2.421276  2.515948    2.165745  2.286314  2.109441
## cg24669183  2.169414  2.235964    2.280734  1.632309  2.184435
## cg15560884  1.761176  1.577578    1.597503  1.777486  1.764999
## cg01014490 -3.504268 -3.825119   -5.384735 -4.537864 -4.296526
## cg17505339  3.082191  3.924931    4.163206  3.255373  3.654134
## cg11954957  1.546401  1.912204    1.727910  2.441267  1.618331
```

```
bVals <- getBeta(mSetSqFilt)
```

```
head(bVals[,1:5])
```

```
##           naive.1    rTreg.2 act_naive.3    naive.4 act_naive.5
## cg13869341  0.84267937 0.85118462    0.8177504 0.82987650 0.81186174
## cg24669183  0.81812908 0.82489238    0.8293297 0.75610281 0.81967323
## cg15560884  0.77219626 0.74903910    0.7516263 0.77417882 0.77266205
## cg01014490  0.08098986 0.06590459    0.0233755 0.04127262 0.04842397
## cg17505339  0.89439216 0.93822870    0.9471357 0.90520570 0.92641305
## cg11954957  0.74495496 0.79008516    0.7681146 0.84450764 0.75431167
```

```
par(mfrow=c(1,2))
```

```
densityPlot(bVals, sampGroups=targets$Sample_Group, main="Beta values",
             legend=FALSE, xlab="Beta values")
```

```
densityPlot(mVals, sampGroups=targets$Sample_Group, main="M-values",
             legend=FALSE, xlab="M values")
```

## Probe-wise differential methylation analysis

The biological question of interest for this particular dataset is to discover differentially methylated probes between the different cell types. However, as was apparent in the MDS plots, there is another factor that we need to take into account when we perform the statistical analysis. In the `targets` file, there is a column called `Sample_Source`, which refers to the individuals that the samples were collected from. In this dataset, each of the individuals contributes more than one cell type. For example, individual M28 contributes `naive`, `rTreg` and `act_naive` samples. Hence, when we specify our design matrix, we need to include two factors: individual and cell type. This style of analysis is called a paired analysis; differences between cell types are calculated *within* each individual, and then these differences are averaged *across* individuals to determine whether there is an overall significant difference in the mean methylation level for each CpG site. The *limma* User's Guide extensively covers the different types of designs that are commonly used for microarray experiments and how to analyse them in R.

We are interested in pairwise comparisons between the four cell types, taking into account individual to individual variation. We perform this analysis on the matrix of M-values in *limma*, obtaining moderated t-statistics and associated p-values for each CpG site. The comparison that has the most significantly differentially methylated CpGs is `naive` vs `rTreg` (n=3021 at 5% false discovery rate (FDR)), while `rTreg` vs `act_rTreg` doesn't show any significant differential methylation.

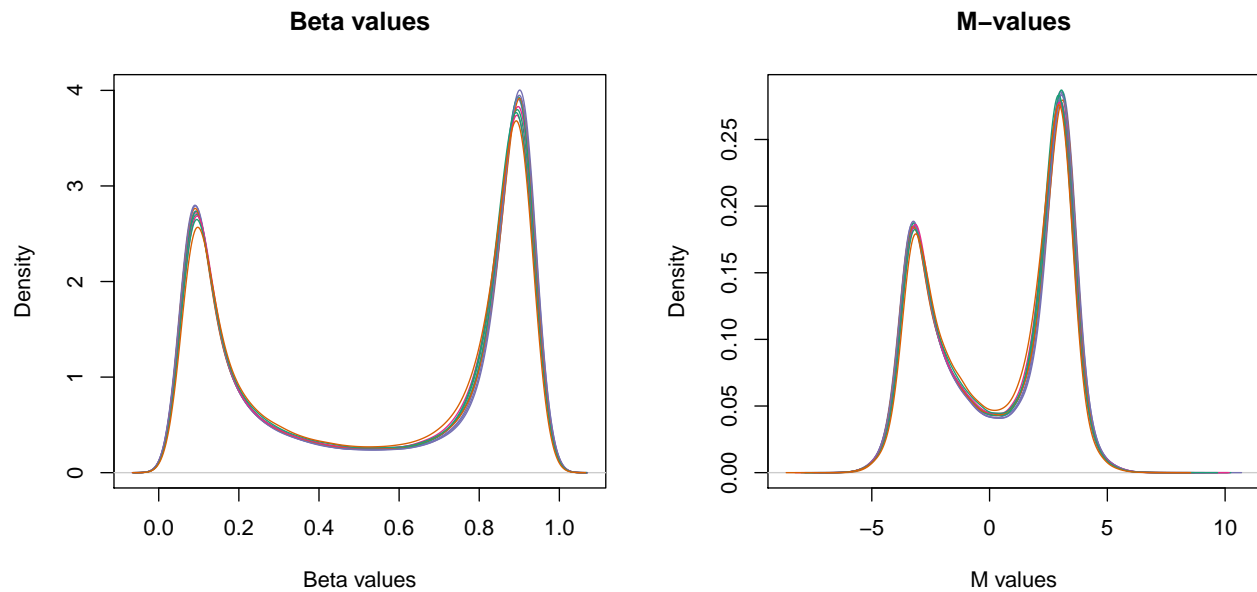

Figure 8: The distributions of beta and M-values are quite different; beta values are constrained between 0 and 1 whilst M-values range between -Inf and Inf.

```
# this is the factor of interest
cellType <- factor(targets$Sample_Group)
# this is the individual effect that we need to account for
individual <- factor(targets$Sample_Source)

# use the above to create a design matrix
design <- model.matrix(~0+cellType+individual, data=targets)
colnames(design) <- c(levels(cellType),levels(individual)[-1])

# fit the linear model
fit <- lmFit(mVals, design)
# create a contrast matrix for specific comparisons
contMatrix <- makeContrasts(
  naive-rTreg,
  naive-act_naive,
  rTreg-act_rTreg,
  act_naive-act_rTreg,
  levels=design)
contMatrix

##           Contrasts
## Levels    naive - rTreg naive - act_naive rTreg - act_rTreg
## act_naive          0          -1             0
## act_rTreg          0           0            -1
## naive              1           1             0
## rTreg              -1           0             1
## M29                 0           0             0
## M30                 0           0             0
##           Contrasts
## Levels    act_naive - act_rTreg
## act_naive              1
## act_rTreg             -1
```

```
## naive 0
## rTreg 0
## M29 0
## M30 0
```

```
# fit the contrasts
fit2 <- contrasts.fit(fit, contMatrix)
fit2 <- eBayes(fit2)

# look at the numbers of DM CpGs at FDR < 0.05
summary(decideTests(fit2))
```

```
## naive - rTreg naive - act_naive rTreg - act_rTreg act_naive - act_rTreg
## -1 1618 400 0 559
## 0 436897 439291 439918 438440
## 1 1403 227 0 919
```

We can extract the tables of differentially expressed CpGs for each comparison, ordered by B-statistic by default, using the `topTable` function in *limma*. The results of the analysis for the first comparison, `naive` vs. `rTreg`, can be saved as a `data.frame` by setting `coef=1`.

```
# get the table of results for the first contrast (naive - rTreg)
ann450kSub <- ann450k[match(rownames(mVals), ann450k$Name),
                        c(1:4, 12:19, 24:ncol(ann450k)))]
DMPs <- topTable(fit2, num=Inf, coef=1, genelist=ann450kSub)
head(DMPs)
```

```
## chr pos strand Name Probe_rs Probe_maf CpG_rs
## cg07499259 chr1 12188502 + cg07499259 <NA> NA <NA>
## cg26992245 chr8 29848579 - cg26992245 <NA> NA <NA>
## cg09747445 chr15 70387268 - cg09747445 <NA> NA <NA>
## cg18808929 chr8 61825469 - cg18808929 <NA> NA <NA>
## cg25015733 chr2 99342986 - cg25015733 <NA> NA <NA>
## cg21179654 chr3 114057297 + cg21179654 <NA> NA <NA>
## CpG_maf SBE_rs SBE_maf Islands_Name
## cg07499259 NA <NA> NA
## cg26992245 NA <NA> NA
## cg09747445 NA <NA> NA chr15:70387929-70393206
## cg18808929 NA <NA> NA chr8:61822358-61823028
## cg25015733 NA <NA> NA chr2:99346882-99348177
## cg21179654 NA <NA> NA
## Relation_to_Island
## cg07499259 OpenSea
## cg26992245 OpenSea
## cg09747445 N_Shore
## cg18808929 S_Shelf
## cg25015733 N_Shelf
## cg21179654 OpenSea
## UCSC_RefGene_Name
## cg07499259 TNFRSF8;TNFRSF8
## cg26992245
## cg09747445 TLE3;TLE3;TLE3
## cg18808929
```

```
## cg25015733 MGAT4A
## cg21179654 ZBTB20;ZBTB20;ZBTB20;ZBTB20;ZBTB20;ZBTB20;ZBTB20
##
## cg07499259
## cg26992245
## cg09747445 NM_0011
## cg18808929
## cg25015733
## cg21179654 NM_001164343;NM_001164346;NM_001164345;NM_001164342;NM_0011643
## UCSC_RefGene_Group Phantom DMR Enhancer
## cg07499259 5'UTR;Body
## cg26992245 TRUE
## cg09747445 Body;Body;Body
## cg18808929 TRUE
## cg25015733 5'UTR
## cg21179654 3'UTR;3'UTR;3'UTR;3'UTR;3'UTR;3'UTR;3'UTR
## HMM_Island Regulatory_Feature_Name
## cg07499259 1:12111023-12111225
## cg26992245
## cg09747445
## cg18808929
## cg25015733
## cg21179654 3:114057192-114057775
## Regulatory_Feature_Group DHS logFC AveExpr
## cg07499259 3.654104 2.46652171
## cg26992245 4.450696 -0.09180715
## cg09747445 -3.337299 -0.25201484
## cg18808929 -2.990263 0.77522878
## cg25015733 -3.054336 0.83280190
## cg21179654 Unclassified_Cell_type_specific 2.859016 1.32460816
## t P.Value adj.P.Val B
## cg07499259 18.73131 7.267204e-08 0.005067836 7.453206
## cg26992245 18.32674 8.615461e-08 0.005067836 7.359096
## cg09747445 -18.24438 8.923101e-08 0.005067836 7.339443
## cg18808929 -17.90181 1.034217e-07 0.005067836 7.255825
## cg25015733 -17.32615 1.333546e-07 0.005067836 7.108231
## cg21179654 17.27804 1.362674e-07 0.005067836 7.095476
```

The resulting `data.frame` can easily be written to a CSV file, which can be opened in Excel.

```
write.table(DMPs, file="DMPs.csv", sep=";", row.names=FALSE)
```

It is always useful to plot sample-wise methylation levels for the top differentially methylated CpG sites to quickly ensure the results make sense. If the plots do not look as expected, it is usually an indication of an error in the code, or in setting up the design matrix. It is easier to interpret methylation levels on the beta value scale, so although the analysis is performed on the M-value scale, we visualise data on the beta value scale. The `plotCpg` function in *minfi* is a convenient way to plot the sample-wise beta values stratified by the grouping variable.

```
# plot the top 4 most significantly differentially methylated CpGs
par(mfrow=c(2,2))
sapply(rownames(DMPs)[1:4], function(cpg){
  plotCpg(bVals, cpg=cpg, pheno=targets$Sample_Group)
})
```

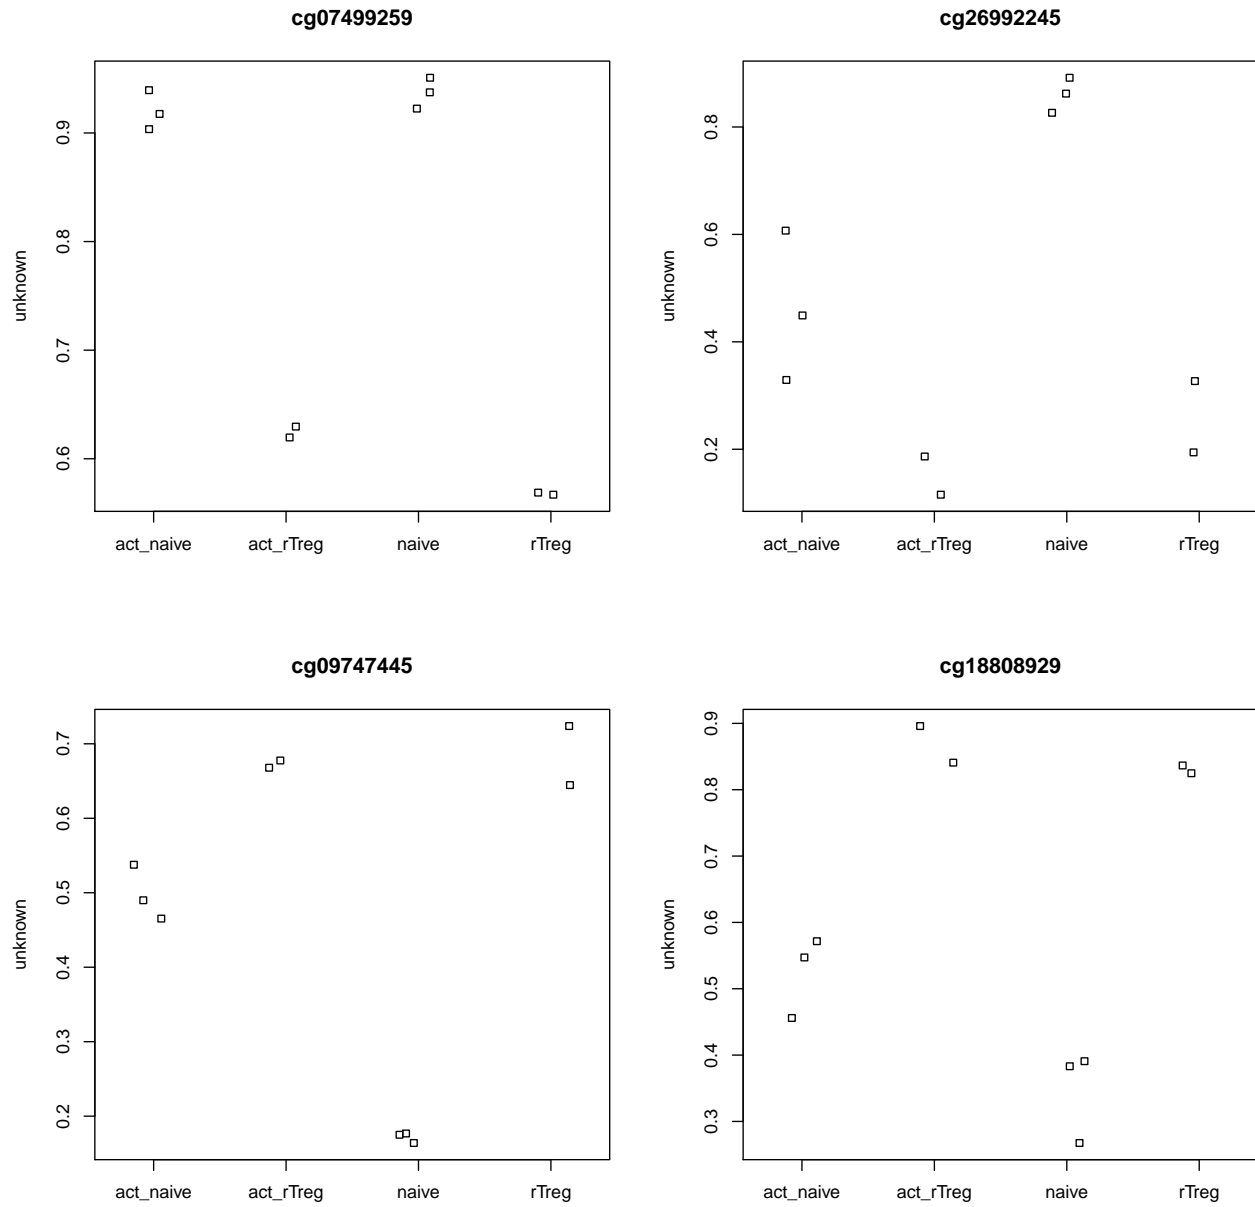

Figure 9: Plotting the top few differentially methylated CpGs is a good way to check whether the results make sense.

```
## $cg07499259
## NULL
##
## $cg26992245
## NULL
##
## $cg09747445
## NULL
##
## $cg18808929
## NULL
```

## Differential methylation analysis of regions

Although performing a *probe-wise* analysis is useful and informative, sometimes we are interested in knowing whether several proximal CpGs are concordantly differentially methylated, that is, we want to identify differentially methylated *regions*. There are several Bioconductor packages that have functions for identifying differentially methylated regions from 450k data. Some of the most popular are the **dmrFind** function in the **charm** package, which has been somewhat superseded for 450k arrays by the **bumphunter** function in **minfi** (Jaffe et al. 2012; Aryee et al. 2014), and, the recently published **dmrcate** in the **DMRcate** package (Peters et al. 2015). They are each based on different statistical methods. In our experience, the **bumphunter** and **dmrFind** functions can be somewhat slow to run unless you have the computer infrastructure to parallelise them, as they use permutations to assign significance. In this workflow, we will perform an analysis using the **dmrcate**. As it is based on *limma*, we can directly use the **design** and **contMatrix** we previously defined.

Firstly, our matrix of M-values is annotated with the relevant information about the probes such as their genomic position, gene annotation, etc. By default, this is done using the **ilmn12.hg19** annotation, but this can be substituted for any argument compatible with the interface provided by the *minfi* package. The *limma* pipeline is then used for differential methylation analysis to calculate moderated t-statistics.

```
myAnnotation <- cpg.annotate(mVals, datatype = "array",
                             analysis.type="differential", design=design,
                             contrasts = TRUE, cont.matrix = contMatrix,
                             coef="naive - rTreg")
```

```
## Your contrast returned 3021 individually significant probes.
```

```
str(myAnnotation)
```

```
## List of 6
## $ ID      : Factor w/ 439918 levels "cg00000029","cg00000108",...: 232388
## $ stat    : num [1:439918] 0.0489 -2.0773 0.7711 -0.0304 -0.764 ...
## $ CHR     : Factor w/ 24 levels "chr1","chr10",...: 1 1 1 1 1 1 1 1 1 1 ...
## $ pos     : int [1:439918] 15865 534242 710097 714177 720865 758829 763119
## $ beta.fc : num [1:439918] 0.00039 -0.04534 0.01594 0.00251 -0.00869 ...
## $ ind.fdr : num [1:439918] 0.994 0.565 0.872 0.997 0.873 ...
## - attr(*, "row.names")= int [1:439918] 425663 55771 233635 431055 235233
## - attr(*, "class")= chr "annot"
```

Once we have the relevant statistics for the individual CpGs, we can then use the **dmrcate** function to combine them to identify differentially methylated regions. The main output table **DMRs\$results** contains all of the regions found, along with their genomic annotations and p-values.



```
DMRs <- dmrcate(myAnnotation, lambda=1000, C=2)
```

```
## Fitting chr1...
## Fitting chr10...
## Fitting chr11...
## Fitting chr12...
## Fitting chr13...
## Fitting chr14...
## Fitting chr15...
## Fitting chr16...
## Fitting chr17...
## Fitting chr18...
## Fitting chr19...
## Fitting chr2...
## Fitting chr20...
## Fitting chr21...
## Fitting chr22...
## Fitting chr3...
## Fitting chr4...
## Fitting chr5...
## Fitting chr6...
## Fitting chr7...
## Fitting chr8...
## Fitting chr9...
## Fitting chrX...
## Fitting chrY...
## Demarcating regions...
## Done!
```

```
head(DMRs$results)
```

```
##               coord no.cpgs      minfdr      Stouffer
## 457   chr17:57915665-57918682      12 4.957890e-91 6.639928e-10
## 733   chr3:114012316-114012912       5 1.622885e-180 1.515378e-07
## 469   chr17:74639731-74640078       6 9.516873e-90 1.527961e-07
## 1069  chrX:49121205-49122718       6 6.753751e-84 2.936984e-07
## 492   chr18:21452730-21453131       7 5.702319e-115 7.674943e-07
## 186  chr10:135202522-135203200      6 1.465070e-65 7.918224e-07
##      maxbetafc meanbetafc
## 457  0.3982862  0.3131611
## 733  0.5434277  0.4251622
## 469 -0.2528645 -0.1951904
## 1069 0.4529088  0.3006242
## 492 -0.3867474 -0.2546089
## 186  0.2803157  0.2293419
```

As for the probe-wise analysis, it is advisable to visualise the results to ensure that they make sense. The regions can easily be viewed using the `DMR.plot` function provided in the *DMRcate* package.

```
# convert the regions to annotated genomic ranges
data(dmrcatedata)
results.ranges <- extractRanges(DMRs, genome = "hg19")

# set up the grouping variables and colours
groups <- pal[1:length(unique(targets$Sample_Group))]
names(groups) <- levels(factor(targets$Sample_Group))
cols <- groups[as.character(factor(targets$Sample_Group))]
samps <- 1:nrow(targets)
```

```
# draw the plot
par(mfrow=c(1,1))
DMR.plot(ranges=results.ranges, dmr=1, CpGs=bVals, phen.col=cols,
         pch=16, toscale=TRUE, plotmedians=TRUE, genome="hg19", samps=samps)
```

## Customising visualisations of methylation data

The *Gviz* package offers powerful functionality for plotting methylation data in its genomic context. The package vignette is very extensive and covers the various types of plots that can be produced using the *Gviz* framework. We will re-plot the top differentially methylated region from the *DMRcate* regional analysis to demonstrate the type of visualisations that can be created.

We will first set up the genomic region we would like to plot by extracting the genomic coordinates of the top differentially methylated region.

```
# indicate which genome is being used
gen <- "hg19"
# extract chromosome number and location from DMR results
coords <- strsplit2(DMRs$results$coord[1],":")
chrom <- coords[1]
start <- as.numeric(strsplit2(coords[2],"-")[1])
```

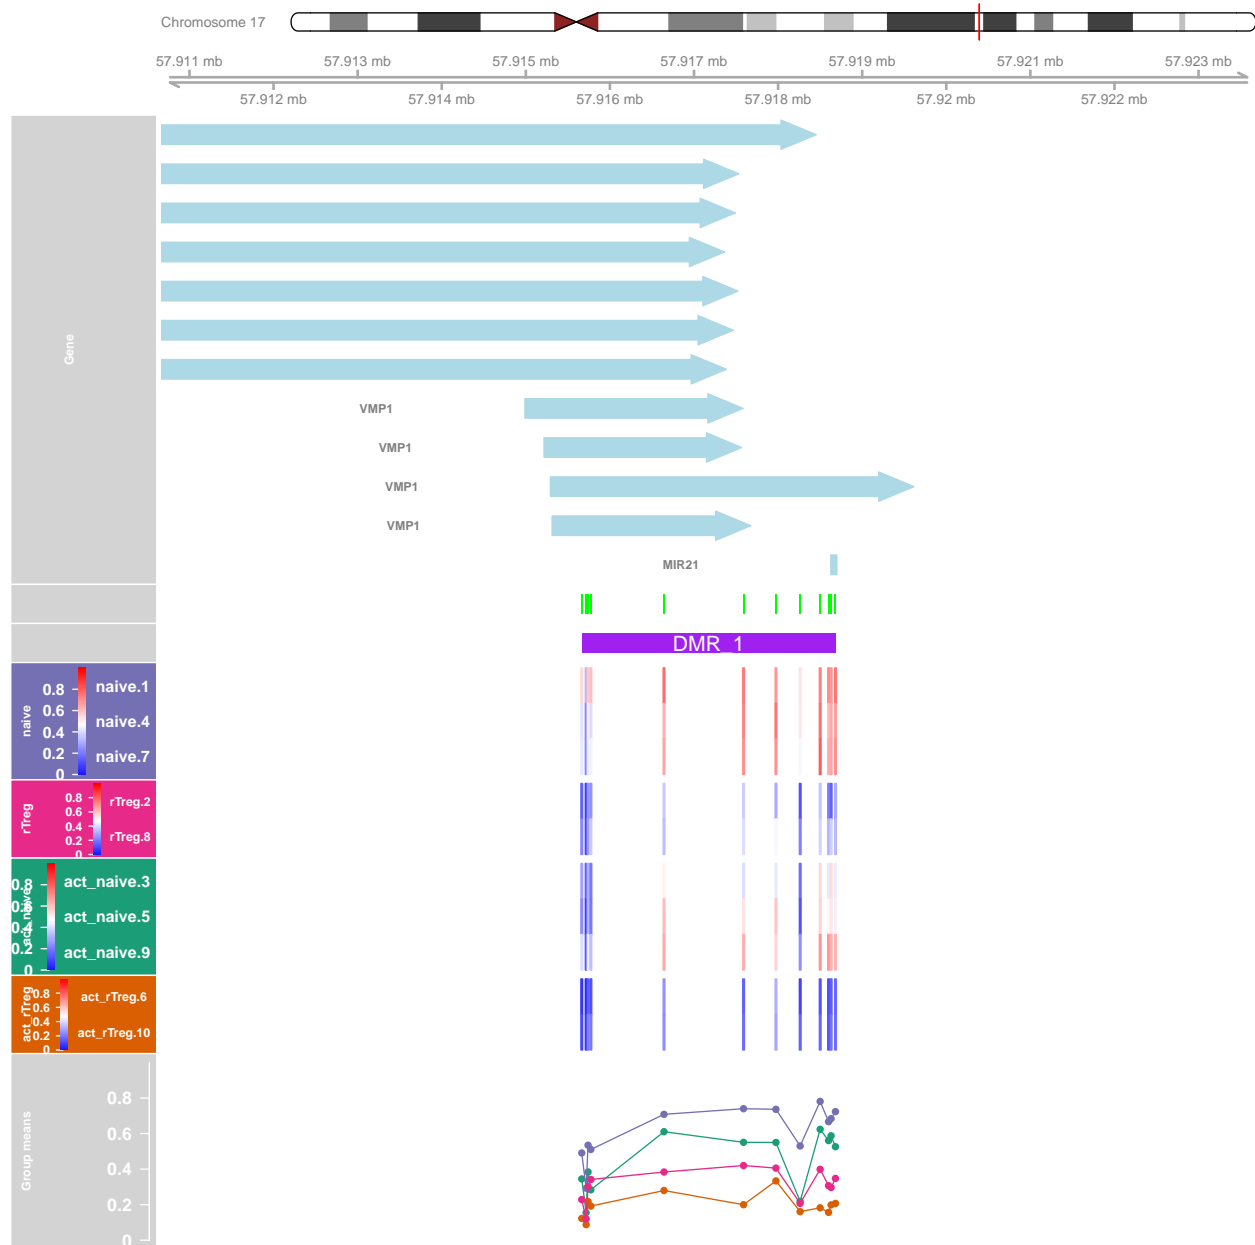

Figure 10: DMRcate provides a function for plotting differentially methylated regions in their genomic context.

```
end <- as.numeric(strsplit2(coords[2], "-")[2])
# add 25% extra space to plot
minbase <- start - (0.25*(end-start))
maxbase <- end + (0.25*(end-start))
```

Next, we will add some genomic annotations of interest such as the locations of CpG islands and DNaseI hypersensitive sites; this can be any feature or genomic annotation of interest that you have data available for. The CpG islands data was generated using the method published by H. Wu et al. (2010); the DNaseI hypersensitive site data was obtained from the UCSC Genome Browser.

```
# CpG islands
islandHMM = read.csv(paste(dataDirectory, "model-based-cpg-islands-hg19.txt",
                           sep="/"),
                    sep="\t", stringsAsFactors=FALSE, header=TRUE)
head(islandHMM)
```

```
##      chr  start    end length CpGcount GCcontent pctGC obsExp
## 1 chr10  93098  93818    721      32      403 0.559  0.572
## 2 chr10  94002  94165    164      12       97 0.591  0.841
## 3 chr10  94527  95302    776      65      538 0.693  0.702
## 4 chr10 119652 120193    542      53      369 0.681  0.866
## 5 chr10 122133 122621    489      51      339 0.693  0.880
## 6 chr10 180265 180720    456      32      256 0.561  0.893
```

```
islandData <- GRanges(seqnames=Rle(islandHMM$chr),
                      ranges=IRanges(start=islandHMM$start, end=islandHMM$end),
                      strand=Rle(strand(rep("n", nrow(islandHMM)))))
islandData <- islandData[seqnames(islandData) == chrom &
                        (start(islandData) >= minbase &
                         end(islandData) <= maxbase)]
islandData
```

```
## GRanges object with 0 ranges and 0 metadata columns:
##      seqnames      ranges strand
##      <Rle> <IRanges> <Rle>
##      -----
##      seqinfo: 81 sequences from an unspecified genome; no seqlengths
```

```
# DNaseI hypersensitive sites
dnase <- read.csv(paste(dataDirectory, "wgEncodeRegDnaseClusteredV3.bed",
                        sep="/"),
                  sep="\t", stringsAsFactors=FALSE, header=FALSE)
head(dnase)
```

```
##      V1      V2      V3 V4  V5 V6
## 1 chr1  10100  10330 38 261 38
## 2 chr1  10345  10590  4 310  4
## 3 chr1  16100  16315  5 158  5
## 4 chr1  65905  66055  1 157  1
## 5 chr1  91405  91615  4 278  4
## 6 chr1 115600 115790  3 545  3
##
```

```
## 1 3,12,13,15,21,22,32,37,36,38,39,40,50,56,57,58,59,60,53,54,62,70,
## 2
## 3
## 4
## 5
## 6
##
## 1 50,247,129,38,52,89,138,61,54,65,35,108,198,34,68,31,48,26,59,42,
## 2
## 3
## 4
## 5
## 6
```

```
dnaseData <- GRanges(seqnames=dnase[,1],
                     ranges=IRanges(start=dnase[,2], end=dnase[,3]),
                     strand=Rle(rep("*",nrow(dnase))),
                     data=dnase[,5])
dnaseData <- dnaseData[seqnames(dnaseData) == chrom &
                      (start(dnaseData) >= minbase &
                       end(dnaseData) <= maxbase)]
dnaseData
```

```
## GRanges object with 6 ranges and 1 metadata column:
##      seqnames      ranges strand |      data
##      <Rle>        <IRanges> <Rle> | <integer>
## [1] chr17 [57915540, 57916410] * |      1000
## [2] chr17 [57916500, 57917035] * |       954
## [3] chr17 [57917040, 57917330] * |       785
## [4] chr17 [57917340, 57918490] * |      1000
## [5] chr17 [57918500, 57918790] * |       440
## [6] chr17 [57918840, 57919175] * |       612
## -----
##      seqinfo: 24 sequences from an unspecified genome; no seqlengths
```

Now, set up the ideogram, genome and RefSeq tracks that will provide context for our methylation data.

```
iTrack <- IdeogramTrack(genome = gen, chromosome = chrom, name="")
gTrack <- GenomeAxisTrack(col="black", cex=1, name="", fontcolor="black")
rTrack <- UcscTrack(genome=gen, chromosome=chrom, track="refGene",
                   from=minbase, to=maxbase, trackType="GeneRegionTrack",
                   rstarts="exonStarts", rends="exonEnds", gene="name",
                   symbol="name2", transcript="name", strand="strand",
                   fill="darkblue", stacking="squish", name="RefSeq",
                   showId=TRUE, geneSymbol=TRUE)
```

Ensure that the methylation data is ordered by chromosome and base position.

```
ann450kOrd <- ann450kSub[order(ann450kSub$chr, ann450kSub$pos),]
head(ann450kOrd)
```

```
## DataFrame with 6 rows and 22 columns
```

```
##          chr      pos      strand      Name      Probe_rs
##          <character> <integer> <character> <character> <character>
## cg13869341      chr1      15865          +      cg13869341      NA
## cg24669183      chr1      534242         -      cg24669183      rs6680725
## cg15560884      chr1      710097          +      cg15560884      NA
## cg01014490      chr1      714177          -      cg01014490      NA
## cg17505339      chr1      720865          -      cg17505339      NA
## cg11954957      chr1      758829          +      cg11954957      rs115498424
##          Probe_maf      CpG_rs      CpG_maf      SBE_rs      SBE_maf
##          <numeric> <character> <numeric> <character> <numeric>
## cg13869341      NA          NA          NA          NA          NA
## cg24669183      0.108100      NA          NA          NA          NA
## cg15560884      NA          NA          NA          NA          NA
## cg01014490      NA          NA          NA          NA          NA
## cg17505339      NA          NA          NA          NA          NA
## cg11954957      0.029514      NA          NA          NA          NA
##          Islands_Name Relation_to_Island UCSC_RefGene_Name
##          <character>          <character>          <character>
## cg13869341          OpenSea          WASH5P
## cg24669183 chr1:533219-534114          S_Shore
## cg15560884 chr1:713984-714547          N_Shelf
## cg01014490 chr1:713984-714547          Island
## cg17505339          OpenSea
## cg11954957 chr1:762416-763445          N_Shelf
##          UCSC_RefGene_Accession UCSC_RefGene_Group      Phantom
##          <character>          <character> <character>
## cg13869341          NR_024540          Body
## cg24669183
## cg15560884
## cg01014490
## cg17505339
## cg11954957
##          DMR      Enhancer      HMM_Island Regulatory_Feature_Name
##          <character> <character>          <character>          <character>
## cg13869341
## cg24669183          1:523025-524193
## cg15560884
## cg01014490          1:703784-704410          1:713802-715219
## cg17505339
## cg11954957
##          Regulatory_Feature_Group      DHS
##          <character> <character>
## cg13869341
## cg24669183
## cg15560884
## cg01014490      Promoter_Associated
## cg17505339
## cg11954957
```

```
bValsOrd <- bVals[match(ann450kOrd$Name,rownames(bVals)),]
head(bValsOrd)
```

```
##          naive.1      rTreg.2 act_naive.3      naive.4 act_naive.5
## cg13869341 0.84267937 0.85118462      0.8177504 0.82987650 0.81186174
```

```
## cg24669183 0.81812908 0.82489238 0.8293297 0.75610281 0.81967323
## cg15560884 0.77219626 0.74903910 0.7516263 0.77417882 0.77266205
## cg01014490 0.08098986 0.06590459 0.0233755 0.04127262 0.04842397
## cg17505339 0.89439216 0.93822870 0.9471357 0.90520570 0.92641305
## cg11954957 0.74495496 0.79008516 0.7681146 0.84450764 0.75431167
##          act_rTreg.6  naive.7  rTreg.8 act_naive.9 act_rTreg.10
## cg13869341 0.8090798 0.8891851 0.88537940 0.90916748 0.88334231
## cg24669183 0.8187838 0.7903763 0.85304116 0.80930568 0.80979554
## cg15560884 0.7721528 0.7658623 0.75909061 0.78099397 0.78569274
## cg01014490 0.0644404 0.0245281 0.02832358 0.07740468 0.04640659
## cg17505339 0.9286016 0.8889361 0.87205348 0.90099782 0.93508348
## cg11954957 0.8116911 0.7832207 0.84929777 0.84719430 0.83350220
```

Create the data tracks using the appropriate track type for each data type.

```
# create genomic ranges object from methylation data
cpgData <- GRanges(seqnames=Rle(ann450kOrd$chr),
                   ranges=IRanges(start=ann450kOrd$pos, end=ann450kOrd$pos),
                   strand=Rle(rep("*",nrow(ann450kOrd))),
                   betas=bValsOrd)

# extract data on CpGs in DMR
cpgData <- subsetByOverlaps(cpgData, results.ranges[1])

# methylation data track
methTrack <- DataTrack(range=cpgData, groups=targets$Sample_Group, genome = gen,
                      chromosome=chrom, ylim=c(-0.05,1.05), col=pal,
                      type=c("a","p"), name="DNA Meth.\n(beta value)",
                      background.panel="white", legend=TRUE, cex.title=0.8,
                      cex.axis=0.8, cex.legend=0.8)

# CpG island track
islandTrack <- AnnotationTrack(range=islandData, genome=gen, name="CpG Is.",
                              chromosome=chrom)

# DNaseI hypersensitive site data track
dnaseTrack <- DataTrack(range=dnaseData, genome=gen, name="DNaseI",
                       type="gradient", chromosome=chrom)

# DMR position data track
dmrTrack <- AnnotationTrack(start=start, end=end, genome=gen, name="DMR",
                           chromosome=chrom)
```

Set up the track list and indicate the relative sizes of the different tracks. Finally, draw the plot using the `plotTracks` function.

```
tracks <- list(iTrack, gTrack, methTrack, dmrTrack, islandTrack, dnaseTrack,
              rTrack)
sizes <- c(2,2,5,2,2,2,3) # set up the relative sizes of the tracks
plotTracks(tracks, from=minbase, to=maxbase, showTitle=TRUE, add53=TRUE,
          add35=TRUE, grid=TRUE, lty.grid=3, sizes=sizes, length(tracks))
```



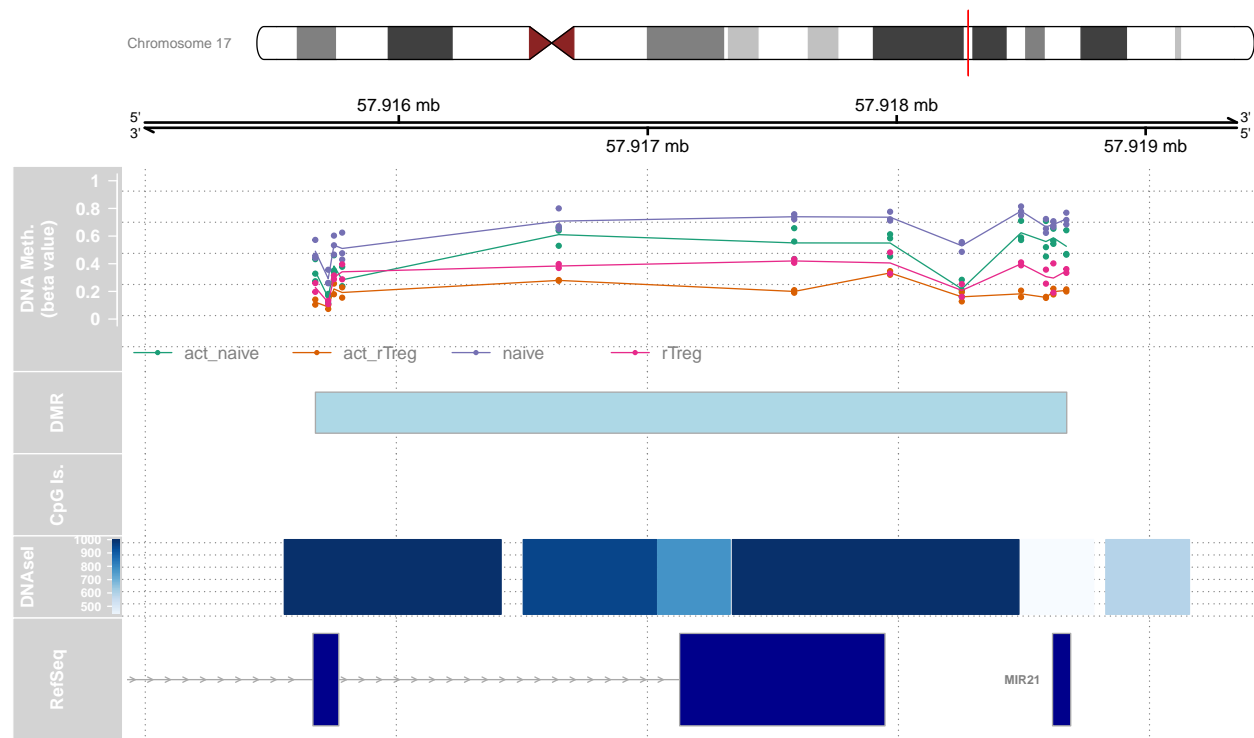

Figure 11: The Gviz package provides extensive functionality for customising plots of genomic regions.

## Additional analyses

### Gene ontology testing

Once you have performed a differential methylation analysis, there may be a very long list of significant CpG sites to interpret. One question a researcher may have is, “which gene pathways are over-represented for differentially methylated CpGs?” In some cases it is relatively straightforward to link the top differentially methylated CpGs to genes that make biological sense in terms of the cell types or samples being studied, but there may be many thousands of CpGs significantly differentially methylated. In order to gain an understanding of the biological processes that the differentially methylated CpGs may be involved in, we can perform gene ontology or KEGG pathway analysis using the `gometh` function in the *missMethyl* package (B. Phipson, Maksimovic, and Oshlack 2016).

Let us consider the first comparison, naive vs rTreg, with the results of the analysis in the `DMPs` table. The `gometh` function takes as input a character vector of the names (e.g. `cg20832020`) of the significant CpG sites, and optionally, a character vector of all CpGs tested. This is recommended particularly if extensive filtering of the CpGs has been performed prior to analysis. For gene ontology testing (default), the user can specify `collection="GO"`; for KEGG testing `collection="KEGG"`. In the `DMPs` table, the `Name` column corresponds to the CpG name. We will select all CpG sites that have adjusted p-value of less than 0.05.

```
# Get the significant CpG sites at less than 5% FDR
sigCpGs <- DMPs$Name[DMPs$adj.P.Val<0.05]
# First 10 significant CpGs
sigCpGs[1:10]
```

```
## [1] "cg07499259" "cg26992245" "cg09747445" "cg18808929" "cg25015733"
## [6] "cg21179654" "cg26280976" "cg16943019" "cg10898310" "cg25130381"
```



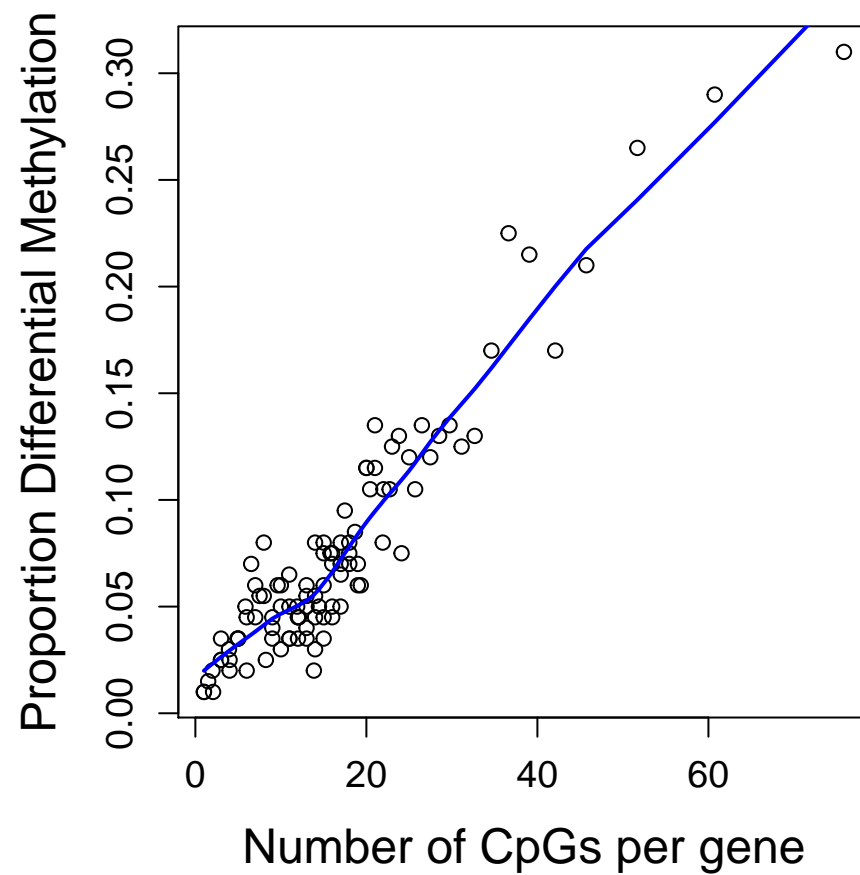

Figure 12: Bias resulting from different numbers of CpG probes in different genes.

```
## G0:0070486 0.0000000000000000008469888595049767
## G0:0042110 0.00000000000000000014907407520342597
##
## FDR
## G0:0002376 0.00000000000000000000000002811273
## G0:0007166 0.00000000000000000073476341932095
## G0:0002682 0.00000000000000000018598856789313
## G0:0001775 0.000000000000000000233066843044544
## G0:0007159 0.000000000000000000234647537842306
## G0:0046649 0.000000000000000000463195894189323
## G0:0045321 0.000000000000000000614880378131680
## G0:0002684 0.000000000000000000614880378131680
## G0:0070486 0.0000000000000000001902431088321456
## G0:0042110 0.0000000000000000002739574936579324
```

From the output we can see many of the top GO categories correspond to immune system and T cell processes, which is unsurprising as the cell types being studied form part of the immune system.

```
# load Broad human curated (C2) gene sets
load(paste(dataDirectory,"human_c2_v5.rdata",sep="/"))
# perform the gene set test(s)
gsa <- gsmeth(sig.cpg=sigCpGs, all.cpg=all, collection=Hs.c2)
```

```
## Warning in alias2SymbolTable(flat$symbol): Multiple symbols ignored for one
## or more aliases
```

| ##                                                | N   | DE  | P.DE | FDR |
|---------------------------------------------------|-----|-----|------|-----|
| ## REACTOME_HEMOSTASIS                            | 466 | 74  | 0    | 0   |
| ## REACTOME_IMMUNE_SYSTEM                         | 933 | 127 | 0    | 0   |
| ## FULCHER_INFLAMMATORY_RESPONSE_LECTIN_VS_LPS_UP | 579 | 85  | 0    | 0   |
| ## DEURIG_T_CELL_PROLYMPHOCYTIC_LEUKEMIA_DN       | 320 | 63  | 0    | 0   |
| ## OSMAN_BLADDER_CANCER_DN                        | 406 | 73  | 0    | 0   |
| ## SENESE_HDAC1_TARGETS_UP                        | 457 | 71  | 0    | 0   |
| ## JAATINEN_HEMATOPOIETIC_STEM_CELL_DN            | 226 | 59  | 0    | 0   |
| ## DACOSTA_UV_RESPONSE_VIA_ERCC3_DN               | 855 | 147 | 0    | 0   |
| ## ZHANG_RESPONSE_TO_IKK_INHIBITOR_AND_TNF_UP     | 223 | 49  | 0    | 0   |
| ## HADDAD_B_LYMPHOCYTE_PROGENITOR                 | 293 | 59  | 0    | 0   |

## Differential variability

Sample size is an important consideration when testing for differentially variable CpG sites. In order to get an accurate estimate of the group variances, larger sample sizes are required than for estimating group means. A good rule of thumb is to have at least ten samples in each group (B. Phipson and Oshlack 2014). To demonstrate testing for differentially variable CpG sites, we will use a publicly available dataset on ageing, where whole blood samples were collected from 18 centenarians and 18 newborns and profiled for methylation on the 450k array (Heyn et al. 2012). We will first need to load, normalise and filter the data as previously described.

```
# set up a path to the ageing data directory
age.dataDirectory <- "/absolute/path/to/your/ageing/data/directory"

age.targets <- read.450k.sheet(base=age.dataDirectory)

## [read.450k.sheet] Found the following CSV files:
## [1] "/group/bioi1/shared/public_data/ageing450k/Heyn/SampleSheet.csv"

age.targets <- age.targets[age.targets$Sample_Group != "WGBS",]

# load the raw 450k from the IDAT files
age.rgSet <- read.450k.exp(targets=age.targets)
age.detP <- detectionP(age.rgSet) # calculate detection p-values

# pre-process the data after excluding poor quality samples
age.mSetSq <- preprocessQuantile(age.rgSet)

## [preprocessQuantile] Mapping to genome.
## [preprocessQuantile] Fixing outliers.
## [preprocessQuantile] Quantile normalizing.

# add sex information to targets information
age.targets$Sex <- getSex(age.mSetSq)$predictedSex

# ensure probes are in the same order in the mSetSq and detP objects
age.detP <- age.detP[match(featureNames(age.mSetSq),rownames(age.detP)),]
# remove poor quality probes
keep <- rowSums(age.detP < 0.01) == ncol(age.detP)
age.mSetSqFlt <- age.mSetSq[keep,]

# remove probes with SNPs at CpG or single base extension (SBE) site
age.mSetSqFlt <- dropLociWithSnps(age.mSetSqFlt, snps = c("CpG", "SBE"))

# remove cross-reactive probes
keep <- !(featureNames(age.mSetSqFlt) %in% xReactiveProbes$TargetID)
age.mSetSqFlt <- age.mSetSqFlt[keep,]
```

As this dataset contains samples from both males and females, we can use it to demonstrate the effect of removing sex chromosome probes on the data. The MDS plots below show the relationship between the samples in the ageing dataset before and after sex chromosome probe removal. It is apparent that before the removal of sex chromosome probes, the sample cluster based on sex in the second principal component. When the sex chromosome probes are removed, age is the largest source of variation present and the male and female samples no longer form separate clusters.

```
# tag sex chromosome probes for removal
keep <- !(featureNames(age.mSetSqFlt) %in% ann450k$Name[ann450k$chr %in%
                                                    c("chrX", "chrY")])

age.pal <- brewer.pal(8, "Set1")
par(mfrow=c(1,2))
plotMDS(getM(age.mSetSqFlt), top=1000, gene.selection="common",
        col=age.pal[factor(age.targets$Sample_Group)], labels=age.targets$Sex,
        main="With Sex CHR Probes")
legend("topleft", legend=levels(factor(age.targets$Sample_Group)),
      text.col=age.pal)

plotMDS(getM(age.mSetSqFlt[keep,]), top=1000, gene.selection="common",
        col=age.pal[factor(age.targets$Sample_Group)], labels=age.targets$Sex,
        main="Without Sex CHR Probes")
legend("top", legend=levels(factor(age.targets$Sample_Group)),
      text.col=age.pal)
```

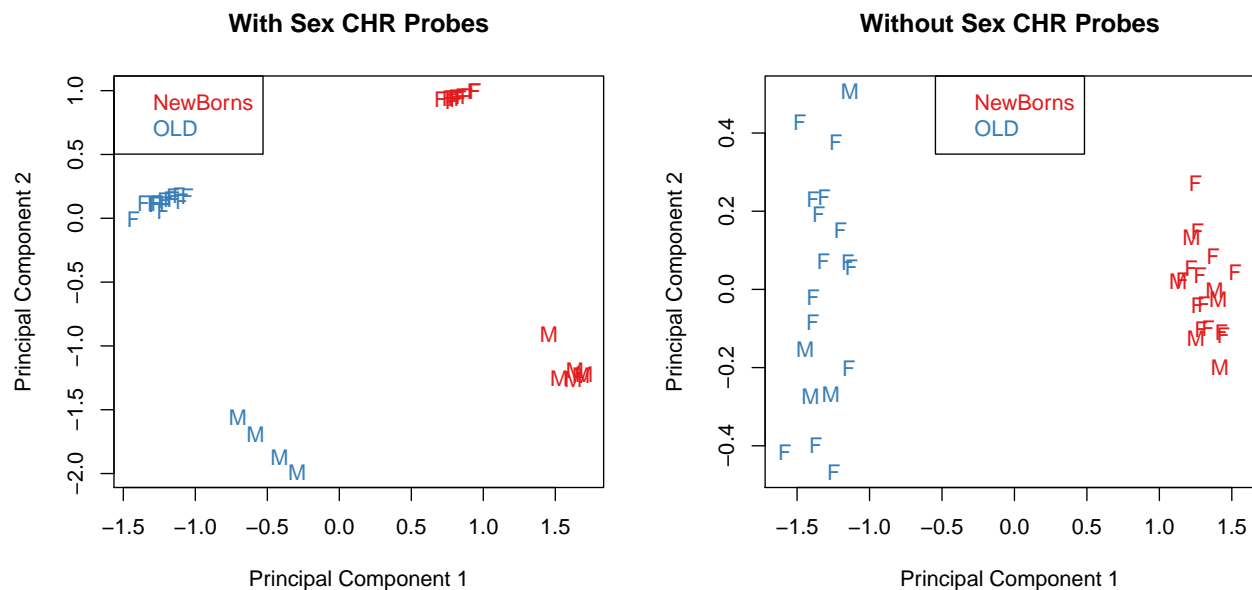

Figure 13: When samples from both males and females are included in a study, sex is usually the largest source of variation in methylation data.

```
# remove sex chromosome probes from data
age.mSetSqFlt <- age.mSetSqFlt[keep,]
```

We can test for differentially variable CpGs using the `varFit` function in the *missMethyl* package. The syntax for specifying which groups we are interested in testing is slightly different to the standard way a model is specified in *limma*, particularly for designs where an intercept is fitted (see *missMethyl* vignette for further details). For the ageing data, the design matrix includes an intercept term, and a term for age. The `coef` argument in the `varFit` function indicates which columns of the design matrix correspond to the intercept and grouping factor. Thus, for the ageing dataset we set `coef=c(1,2)`. Note that design matrices without intercept terms are permitted, with specific contrasts tested using the `contrasts.varFit` function.

```
# get M-values for analysis
age.mVals <- getM(age.mSetSqFlt)

design <- model.matrix(~factor(age.targets$Sample_Group))
# Fit the model for differential variability
# specifying the intercept and age as the grouping factor
fitvar <- varFit(age.mVals, design = design, coef = c(1,2))

# Summary of differential variability
summary(decideTests(fitvar))

##      (Intercept) factor(age.targets$Sample_Group)OLD
## -1             0                               1325
## 0             11441                             393451
## 1             417787                             34452

topDV <- topVar(fitvar, coef=2)
# Top 10 differentially variable CpGs between old vs. newborns
topDV

##      SampleVar LogVarRatio DiffLevene      t      P.Value
## cg19078576 1.1128910      3.746586 0.8539180 7.006476 0.0000000006234780
## cg11661000 0.5926226      3.881306 0.8413614 6.945711 0.0000000008176807
## cg07065220 1.0111380      4.181802 0.9204407 6.840327 0.0000000013069867
## cg05995465 1.4478673     -5.524284 -1.3035981 -6.708321 0.0000000023462074
## cg18091046 1.1121511      3.564282 1.0983340 6.679920 0.0000000026599570
## cg05491001 0.9276904      3.869760 0.7118591 6.675892 0.0000000027077013
## cg05542681 1.0287320      3.783637 0.9352814 6.635588 0.0000000032347355
## cg02726803 0.3175570      4.063650 0.6418968 6.607508 0.0000000036608219
## cg08362283 1.0028907      4.783899 0.6970960 6.564472 0.0000000044240941
## cg18160402 0.5624192      3.716228 0.5907985 6.520508 0.0000000053665347
##      Adj.P.Value
## cg19078576 0.0001754857
## cg11661000 0.0001754857
## cg07065220 0.0001869984
## cg05995465 0.0001937035
## cg18091046 0.0001937035
## cg05491001 0.0001937035
## cg05542681 0.0001964159
## cg02726803 0.0001964159
## cg08362283 0.0002109939
## cg18160402 0.0002303467
```

Similarly to the differential methylation analysis, is it useful to plot sample-wise beta values for the differentially variable CpGs to ensure the significant results are not driven by artifacts or outliers.

```
# get beta values for ageing data
age.bVals <- getBeta(age.mSetSqFlt)

par(mfrow=c(2,2))
sapply(rownames(topDV)[1:4], function(cpg){
  plotCpg(age.bVals, cpg=cpg, pheno=age.targets$Sample_Group)
})
```



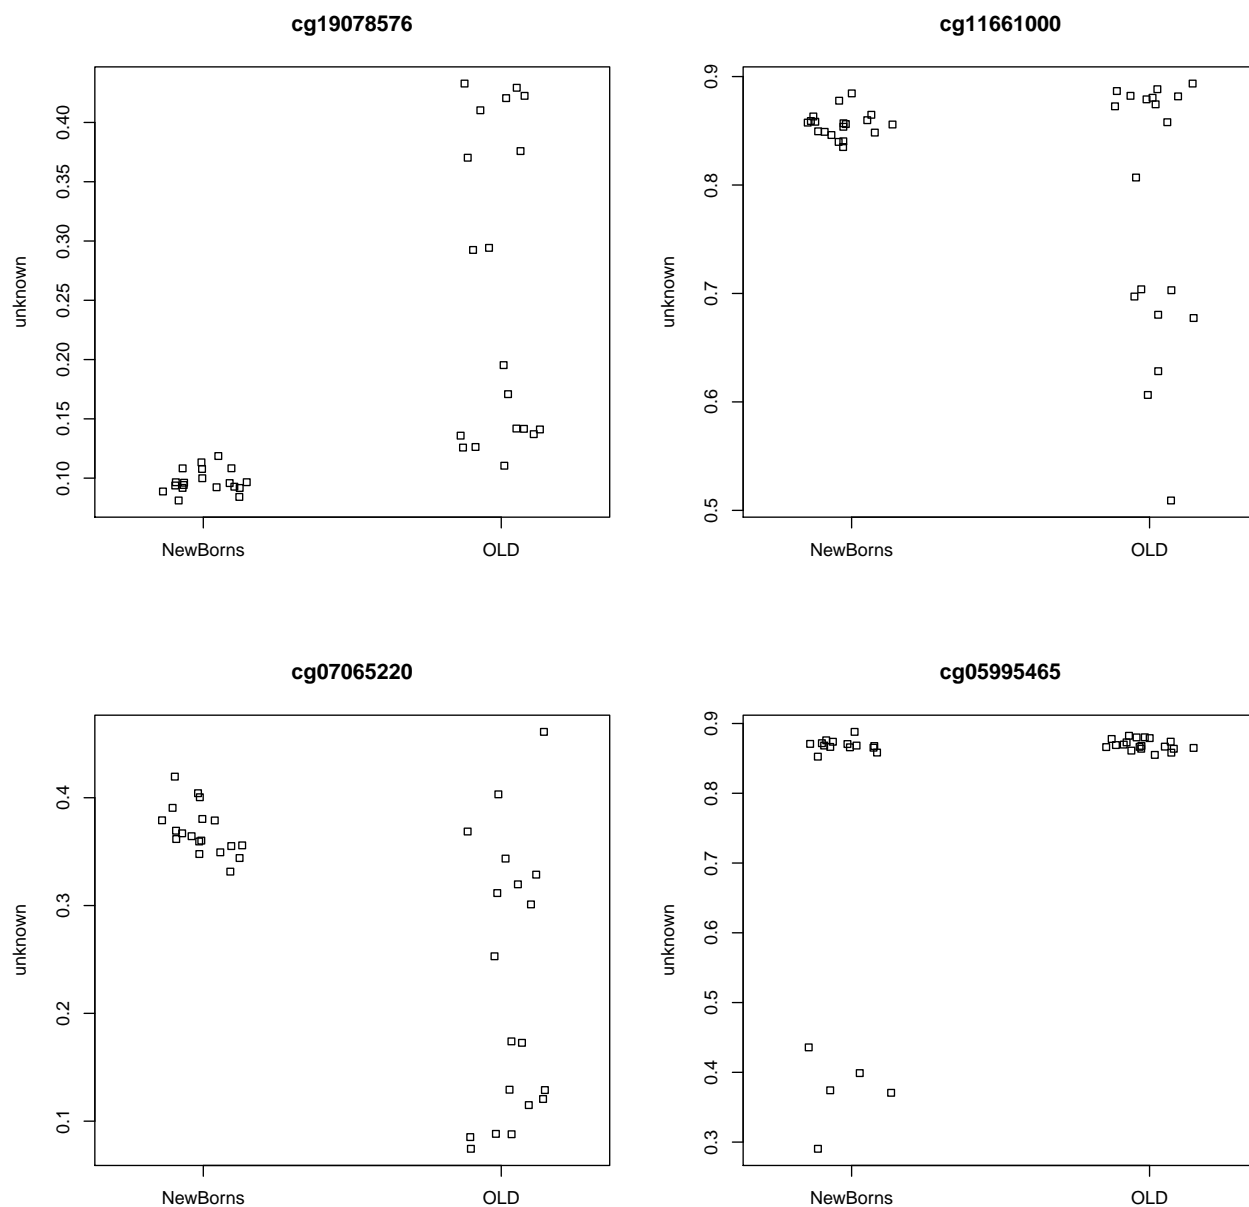

Figure 14: As for DMPs, it is useful to plot the top few differentially variable CpGs to check that the results make sense.

An example of testing for differential variability when the design matrix does not have an intercept term is detailed in the *missMethyl* vignette.

## Cell type composition

As methylation is cell type specific and methylation arrays provide CpG methylation values for a population of cells, biological findings from samples that are comprised of a mixture of cell types, such as blood, can be confounded with cell type composition (Jaffe and Irizarry 2014). The *minfi* function `estimateCellCounts` facilitates the estimation of the level of confounding between phenotype and cell type composition in a set of samples. The function uses a modified version of the method published by Houseman et al. (2012) and the package `FlowSorted.Blood.450k`, which contains 450k methylation data from sorted blood cells, to estimate the cell type composition of blood samples.

```
# load sorted blood cell data package
library(FlowSorted.Blood.450k)
# ensure that the "Slide" column of the rgSet pheno data is numeric
# to avoid "estimateCellCounts" error
pData(age.rgSet)$Slide <- as.numeric(pData(age.rgSet)$Slide)
# estimate cell counts
cellCounts <- estimateCellCounts(age.rgSet)

## [estimateCellCounts] Combining user data with reference (flow sorted) data.
## [estimateCellCounts] Normalizing user and reference data together.
## [estimateCellCounts] Picking probes for composition estimation.
## [estimateCellCounts] Estimating composition.

# plot cell type proportions by age
par(mfrow=c(1,1))
a = cellCounts[age.targets$Sample_Group == "NewBorns",]
b = cellCounts[age.targets$Sample_Group == "OLD",]
boxplot(a, at=0:5*3 + 1, xlim=c(0, 18), ylim=range(a, b), xaxt="n",
        col=age.pal[1], main="", ylab="Cell type proportion")
boxplot(b, at=0:5*3 + 2, xaxt="n", add=TRUE, col=age.pal[2])
axis(1, at=0:5*3 + 1.5, labels=colnames(a), tick=TRUE)
legend("topleft", legend=c("NewBorns", "OLD"), fill=age.pal)
```

As reported by Jaffe and Irizarry (2014), the preceding plot demonstrates that differences in blood cell type proportions are strongly confounded with age in this dataset. Performing cell composition estimation can alert you to potential issues with confounding when analysing a mixed cell type dataset. Based on the results, some type of adjustment for cell type composition may be considered, although a naive cell type adjustment is not recommended. Jaffe and Irizarry (2014) outline several strategies for dealing with cell type composition issues.

## Discussion

Here we present a commonly used workflow for methylation array analysis based on a series of Bioconductor packages. While we have not included all the possible functions or analysis options that are available for detecting differential methylation, we have demonstrated a common and well used workflow that we regularly use in our own analysis. Specifically, we have not demonstrated more complex types of analyses such as removing unwanted variation in a differential methylation study (Maksimovic et al. 2015; Leek et al. 2012; Teschendorff, Zhuang, and Widschwendter 2011), block finding (K. D. Hansen et al. 2011; Aryee et al. 2014)

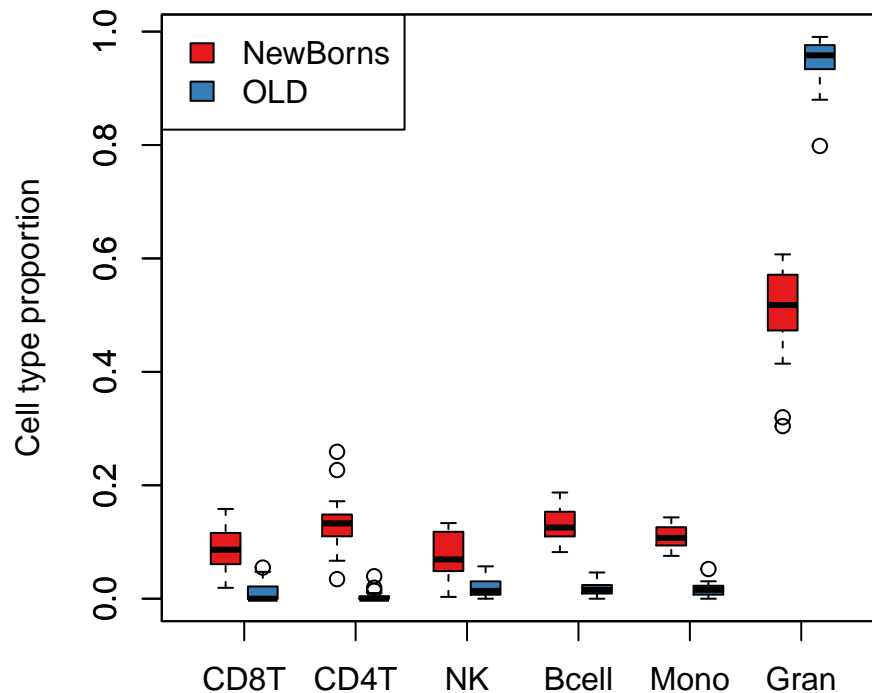

Figure 15: If samples come from a population of mixed cells e.g. blood, it is advisable to check for potential confounding between differences in cell type proportions and the factor of interest.

or A/B compartment prediction (J.-P. Fortin and Hansen 2015). Our differential methylation workflow presented here demonstrates how to read in data, perform quality control and filtering, normalisation and differential methylation testing. In addition we demonstrate analysis for differential variability, gene set testing and estimating cell type composition. One important aspect of exploring results of an analysis is visualisation and we also provide an example of generating region-level views of the data.

## Software versions

```
sessionInfo()
```

```
## R version 3.2.3 (2015-12-10)
## Platform: x86_64-pc-linux-gnu (64-bit)
## Running under: CentOS release 6.7 (Final)
##
## locale:
##  [1] LC_CTYPE=en_US.UTF-8      LC_NUMERIC=C
##  [3] LC_TIME=en_US.UTF-8      LC_COLLATE=en_US.UTF-8
##  [5] LC_MONETARY=en_US.UTF-8  LC_MESSAGES=en_US.UTF-8
##  [7] LC_PAPER=en_US.UTF-8     LC_NAME=C
##  [9] LC_ADDRESS=C             LC_TELEPHONE=C
## [11] LC_MEASUREMENT=en_US.UTF-8 LC_IDENTIFICATION=C
##
## attached base packages:
##  [1] splines    grid      stats4    parallel  stats      graphics  grDevices
##  [8] utils      datasets  methods   base
```

```
##
## other attached packages:
## [1] FlowSorted.Blood.450k_1.8.0
## [2] GO.db_3.2.2
## [3] org.Hs.eg.db_3.2.3
## [4] AnnotationDbi_1.32.3
## [5] stringr_1.0.0
## [6] DMRcate_1.6.53
## [7] DMRcatedata_1.6.1
## [8] DSS_2.10.0
## [9] bsseq_1.6.0
## [10] Gviz_1.14.7
## [11] minfiData_0.12.0
## [12] matrixStats_0.50.2
## [13] missMethyl_1.4.0
## [14] RSQLite_1.0.0
## [15] DBI_0.3.1
## [16] RColorBrewer_1.1-2
## [17] IlluminaHumanMethylation450kmanifest_0.4.0
## [18] IlluminaHumanMethylation450kanno.ilmn12.hg19_0.2.1
## [19] minfi_1.16.1
## [20] bumpHunter_1.10.0
## [21] locfit_1.5-9.1
## [22] iterators_1.0.8
## [23] foreach_1.4.3
## [24] Biostrings_2.38.4
## [25] XVector_0.10.0
## [26] SummarizedExperiment_1.0.2
## [27] GenomicRanges_1.22.4
## [28] GenomeInfoDb_1.6.3
## [29] IRanges_2.4.8
## [30] S4Vectors_0.8.11
## [31] lattice_0.20-33
## [32] Biobase_2.30.0
## [33] BiocGenerics_0.16.1
## [34] limma_3.26.9
##
## loaded via a namespace (and not attached):
## [1] nlme_3.1-127          bitops_1.0-6
## [3] tools_3.2.3          doRNG_1.6
## [5] nor1mix_1.2-1        rpart_4.1-10
## [7] Hmisc_3.17-3         colorspace_1.2-6
## [9] nnet_7.3-12          methylumi_2.16.0
## [11] gridExtra_2.2.1      base64_1.1
## [13] chron_2.3-47         preprocessCore_1.32.0
## [15] formatR_1.4          pkgmaker_0.22
## [17] rtracklayer_1.30.4   scales_0.4.0
## [19] genefilter_1.52.1    quadprog_1.5-5
## [21] digest_0.6.9         Rsamtools_1.22.0
## [23] foreign_0.8-66       R.utils_2.3.0
## [25] illuminaio_0.12.0    rmarkdown_0.9.6.6
## [27] siggenes_1.44.0      GEOquery_2.36.0
## [29] dichromat_2.0-0      htmltools_0.3.5
## [31] BSgenome_1.38.0      ruv_0.9.6
```

```
## [33] gtools_3.5.0           mclust_5.2
## [35] BiocParallel_1.4.3      R.oo_1.20.0
## [37] acepack_1.3-3.3         VariantAnnotation_1.16.4
## [39] RCurl_1.96-0            magrittr_1.5
## [41] Formula_1.2-1           futile.logger_1.4.1
## [43] Matrix_1.2-5            Rcpp_0.12.4
## [45] munsell_0.4.3           R.methodsS3_1.7.1
## [47] stringi_1.0-1           yaml_2.1.13
## [49] MASS_7.3-45             zlibbioc_1.16.0
## [51] plyr_1.8.3              multtest_2.26.0
## [53] GenomicFeatures_1.22.13 annotate_1.48.0
## [55] knitr_1.12.3            beanplot_1.2
## [57] igraph_1.0.1            rngtools_1.2.4
## [59] corpcor_1.6.8           codetools_0.2-14
## [61] biomaRt_2.26.1          mixOmics_5.2.0
## [63] futile.options_1.0.0    XML_3.98-1.4
## [65] evaluate_0.9            biovizBase_1.18.0
## [67] latticeExtra_0.6-28     data.table_1.9.6
## [69] lambda.r_1.1.7          gtable_0.2.0
## [71] reshape_0.8.5           ggplot2_2.1.0
## [73] xtable_1.8-2            survival_2.39-2
## [75] GenomicAlignments_1.6.3 registry_0.3
## [77] ellipse_0.3-8           cluster_2.0.4
## [79] statmod_1.4.24
```

## Author contributions

JM and BP designed the content and wrote the paper. AO oversaw the project and contributed to the writing and editing of the paper.

## Competing interests

No competing interests were disclosed.

## Grant information

AO was supported by an NHMRC Career Development Fellowship APP1051481.

## References

- Aryee, Martin J, Andrew E Jaffe, Hector Corrada-Bravo, Christine Ladd-Acosta, Andrew P Feinberg, Kasper D Hansen, and Rafael a Irizarry. 2014. “Minfi: a flexible and comprehensive Bioconductor package for the analysis of Infinium DNA methylation microarrays.” *Bioinformatics (Oxford, England)* 30 (10): 1363–9. doi:10.1093/bioinformatics/btu049.
- Aryee, Martin J, Zhijin Wu, Christine Ladd-Acosta, Brian Herb, Andrew P Feinberg, Srinivasan Yegnasubramanian, and Rafael a Irizarry. 2011. “Accurate genome-scale percentage DNA methylation estimates from

microarray data.” *Biostatistics (Oxford, England)* 12 (2): 197–210. doi:10.1093/biostatistics/kxq055.

Bibikova, Marina, Bret Barnes, Chan Tsan, Vincent Ho, Brandy Klotzle, Jennie M Le, David Delano, et al. 2011. “High density DNA methylation array with single CpG site resolution.” *Genomics* 98 (4). Elsevier Inc.: 288–95. doi:10.1016/j.ygeno.2011.07.007.

Bibikova, Marina, Jennie Le, Bret Barnes, Shadi Saedinia-Melnyk, Lixin Zhou, Richard Shen, and Kevin L Gunderson. 2009. “Genome-wide DNA methylation profiling using Infinium assay.” *Epigenomics* 1 (1). Future Medicine Ltd London, UK: 177–200. doi:10.2217/epi.09.14.

Bird, Adrian. 2002. “DNA methylation patterns and epigenetic memory.” *Genes & Development* 16 (1): 6–21. doi:10.1101/gad.947102.

Chen, Yi-an, Mathieu Lemire, Sanaa Choufani, Darci T Butcher, Daria Grafodatskaya, Brent W Zanke, Steven Gallinger, Thomas J Hudson, and Rosanna Weksberg. 2013. “Discovery of cross-reactive probes and polymorphic CpGs in the Illumina Infinium HumanMethylation450 microarray.” *Epigenetics : Official Journal of the DNA Methylation Society* 8 (2). Landes Bioscience: 203–9. doi:10.4161/epi.23470.

Cruickshank, Mark N, Alicia Oshlack, Christiane Theda, Peter G Davis, David Martino, Penelope Sheehan, Yun Dai, Richard Saffery, Lex W Doyle, and Jeffrey M Craig. 2013. “Analysis of epigenetic changes in survivors of preterm birth reveals the effect of gestational age and evidence for a long term legacy.” *Genome Medicine* 5 (10): 96. doi:10.1186/gm500.

Davis, Sean, Pan Du, Sven Bilke, Tim Triche, Jr., and Moiz Bootwalla. 2015. *Methylumi: Handle Illumina Methylation Data*.

Du, Pan, Xiao Zhang, Chiang-Ching Huang, Nadereh Jafari, Warren a Kibbe, Lifang Hou, and Simon M Lin. 2010. “Comparison of Beta-value and M-value methods for quantifying methylation levels by microarray analysis.” *BMC Bioinformatics* 11 (1). BioMed Central Ltd: 587. doi:10.1186/1471-2105-11-587.

Fortin, Jean-Philippe, and Kasper D Hansen. 2015. “Reconstructing A/B compartments as revealed by Hi-C using long-range correlations in epigenetic data.” *Genome Biology* 16 (1). BioMed Central: 180. doi:10.1186/s13059-015-0741-y.

Fortin, JP, Aurélie Labbe, Mathieu Lemire, and BW Zanke. 2014. “Functional normalization of 450k methylation array data improves replication in large cancer studies.” *Genome Biology* 15 (503): 1–17.

Hansen, Kasper Daniel, Winston Timp, Héctor Corrada Bravo, Sarven Sabuncian, Benjamin Langmead, Oliver G McDonald, Bo Wen, et al. 2011. “Increased methylation variation in epigenetic domains across cancer types.” *Nature Genetics* 43 (8): 768–75. doi:10.1038/ng.865.

Heyn, Holger, Ning Li, HJ Humberto J Ferreira, Sebastian Moran, David G Pisano, Antonio Gomez, and Javier Diez. 2012. “Distinct DNA methylomes of newborns and centenarians.” *Proceedings of the National Academy of Sciences of the United States of America* 109 (26): 10522–7. doi:10.1073/pnas.1120658109/-/DCSupplemental.www.pnas.org/cgi/doi/10.1073/pnas.1120658109.

Houseman, Eugene Andres, William P Accomando, Devin C Koestler, Brock C Christensen, Carmen J Marsit, Heather H Nelson, John K Wiencke, and Karl T Kelsey. 2012. “DNA methylation arrays as surrogate measures of cell mixture distribution.” *BMC Bioinformatics* 13 (1): 86. doi:10.1186/1471-2105-13-86.

Huber, W., Carey, V. J., Gentleman, R., Anders, et al. 2015. “Orchestrating High-Throughput Genomic Analysis with Bioconductor.” *Nature Methods* 12 (2): 115–21. <http://www.nature.com/nmeth/journal/v12/n2/full/nmeth.3252.html>.

Jaffe, Andrew E, and Rafael a Irizarry. 2014. “Accounting for cellular heterogeneity is critical in epigenome-wide association studies.” *Genome Biology* 15 (2): R31. doi:10.1186/gb-2014-15-2-r31.

Jaffe, Andrew E, Peter Murakami, Hwajin Lee, Jeffrey T Leek, M Daniele Fallin, Andrew P Feinberg, and Rafael a Irizarry. 2012. “Bump hunting to identify differentially methylated regions in epigenetic epidemiology studies.” *International Journal of Epidemiology* 41 (1): 200–209. doi:10.1093/ije/dyr238.

Laird, Peter W. 2003. “The power and the promise of DNA methylation markers.” *Nature Reviews. Cancer*

3 (4): 253–66. doi:10.1038/nrc1045.

Leek, Jeffrey T, W Evan Johnson, Hilary S Parker, Andrew E Jaffe, and John D Storey. 2012. “The sva package for removing batch effects and other unwanted variation in high-throughput experiments.” *Bioinformatics (Oxford, England)* 28 (6): 882–3. doi:10.1093/bioinformatics/bts034.

Maksimovic, Jovana, Johann A Gagnon-Bartsch, Terence P Speed, and Alicia Oshlack. 2015. “Removing unwanted variation in a differential methylation analysis of Illumina HumanMethylation450 array data.” *Nucleic Acids Research*, May, gkv526. doi:10.1093/nar/gkv526.

Maksimovic, Jovana, Lavinia Gordon, and Alicia Oshlack. 2012. “SWAN: Subset-quantile within array normalization for illumina infinium HumanMethylation450 BeadChips.” *Genome Biology* 13 (6). BioMed Central Ltd: R44. doi:10.1186/gb-2012-13-6-r44.

Mancuso, Francesco M, Magda Montfort, Anna Carreras, Andreu Alibés, and Guglielmo Roma. 2011. “Hum-Meth27QCReport: an R package for quality control and primary analysis of Illumina Infinium methylation data.” *BMC Research Notes* 4 (January): 546. doi:10.1186/1756-0500-4-546.

Morris, Tiffany J, Lee M Butcher, Andrew Feber, Andrew E Teschendorff, Ankur R Chakravarthy, Tomasz K Wojdacz, and Stephan Beck. 2014. “ChAMP: 450k Chip Analysis Methylation Pipeline.” *Bioinformatics (Oxford, England)* 30 (3): 428–30. doi:10.1093/bioinformatics/btt684.

Peters, Timothy J, Michael J Buckley, Aaron L Statham, Ruth Pidsley, Katherine Samaras, Reginald V Lord, Susan J Clark, and Peter L Molloy. 2015. “De novo identification of differentially methylated regions in the human genome.” *Epigenetics & Chromatin* 8 (1). BioMed Central: 6. doi:10.1186/1756-8935-8-6.

Phipson, Belinda, and Alicia Oshlack. 2014. “DiffVar: a new method for detecting differential variability with application to methylation in cancer and aging.” *Genome Biology* 15 (9). BioMed Central: 465. doi:10.1186/s13059-014-0465-4.

Phipson, Belinda, Jovana Maksimovic, and Alicia Oshlack. 2016. “missMethyl: an R package for analyzing data from Illumina’s HumanMethylation450 platform.” *Bioinformatics (Oxford, England)* 32 (2): 286–88. doi:10.1093/bioinformatics/btv560.

Pidsley, Ruth, Chloe C Y Wong, Manuela Volta, Katie Lunnon, Jonathan Mill, and Leonard C Schalkwyk. 2013. “A data-driven approach to preprocessing Illumina 450K methylation array data.” *BMC Genomics* 14 (1). BioMed Central: 293. doi:10.1186/1471-2164-14-293.

R Core Team. 2014. “R: A language and environment for statistical computing.” Vienna, Austria: R Foundation for Statistical Computing. <http://www.r-project.org/>.

Ritchie, M. E., B. Phipson, D. Wu, Y. Hu, C. W. Law, W. Shi, and G. K. Smyth. 2015. “limma powers differential expression analyses for RNA-sequencing and microarray studies.” *Nucleic Acids Research*, January, gkv007. doi:10.1093/nar/gkv007.

Sun, Zhifu, High Seng Chai, Yanhong Wu, Wendy M White, Krishna V Donkena, Christopher J Klein, Vesna D Garovic, Terry M Therneau, and Jean-Pierre a Kocher. 2011. “Batch effect correction for genome-wide methylation data with Illumina Infinium platform.” *BMC Medical Genomics* 4 (January): 84. doi:10.1186/1755-8794-4-84.

Teschendorff, Andrew E, Francesco Marabita, Matthias Lechner, Thomas Bartlett, Jesper Tegner, David Gomez-Cabrero, and Stephan Beck. 2013. “A beta-mixture quantile normalization method for correcting probe design bias in Illumina Infinium 450 k DNA methylation data.” *Bioinformatics (Oxford, England)* 29 (2): 189–96. doi:10.1093/bioinformatics/bts680.

Teschendorff, Andrew E, Joanna Zhuang, and Martin Widschwendter. 2011. “Independent surrogate variable analysis to deconvolve confounding factors in large-scale microarray profiling studies.” *Bioinformatics (Oxford, England)* 27 (11): 1496–1505. doi:10.1093/bioinformatics/btr171.

Touleimat, Nizar, and Jörg Tost. 2012. “Complete pipeline for Infinium Human Methylation 450K BeadChip data processing using subset quantile normalization for accurate DNA methylation estimation.” *Epigenomics*

4 (3): 325–41. doi:10.2217/epi.12.21.

Triche, Timothy J, Daniel J Weisenberger, David Van Den Berg, Peter W Laird, and Kimberly D Siegmund. 2013. “Low-level processing of Illumina Infinium DNA Methylation BeadArrays.” *Nucleic Acids Research* 41 (7): e90. doi:10.1093/nar/gkt090.

Wang, Dong, Yuannv Zhang, Yan Huang, Pengfei Li, Mingyue Wang, Ruihong Wu, Lixin Cheng, et al. 2012. “Comparison of different normalization assumptions for analyses of DNA methylation data from the cancer genome.” *Gene* 506 (1). Elsevier B.V.: 36–42. doi:10.1016/j.gene.2012.06.075.

Wu, Hao, Brian Caffo, Harris A Jaffee, Rafael A Irizarry, and Andrew P Feinberg. 2010. “Redefining CpG islands using hidden Markov models.” *Biostatistics (Oxford, England)* 11 (3): 499–514. doi:10.1093/biostatistics/kxq005.

Wu, Michael C, Bonnie R Joubert, Pei-fen Kuan, Siri E Håberg, Wenche Nystad, Shyamal D Peddada, and Stephanie J London. 2014. “A systematic assessment of normalization approaches for the Infinium 450K methylation platform.” *Epigenetics : Official Journal of the DNA Methylation Society* 9 (2): 318–29. doi:10.4161/epi.27119.

Zhang, Yuxia, Jovana Maksimovic, Gaetano Naselli, Junyan Qian, Michael Chopin, Marnie E Blewitt, Alicia Oshlack, and Leonard C Harrison. 2013. “Genome-wide DNA methylation analysis identifies hypomethylated genes regulated by FOXP3 in human regulatory T cells.” *Blood* 122 (16): 2823–36. doi:10.1182/blood-2013-02-481788.
